# Supplementary material for: Association between non-alcoholic fatty liver disease and arterial stiffness measured by brachial-ankle pulse wave velocity: a cross-sectional population study
Source: PeerJ. 2025 May 19;13:e19405. doi: 10.7717/peerj.19405 (PMC12097236; doi:10.7717/peerj.19405)
Supplement: Supplemental Information 13 — Data on subjects from the physical examination center, including included and excluded individuals. [file peerj-13-19405-s013.xlsx]

## Sheet: raw data
number	male	age	NAFLD	BMI	baPWV	classification of AS	TC	LDL	HDL	TG	UA	FBG	diabetes	hypertension	drinking	smoking	exercise
1	1	55	1	39.8	1314.5	0	1	1	1	1	0	0	0	0	0	0	0
2	0	56	1	39.3	1379	0	0	0	1	1	0	1	1	1	0	0	0
3	1	47	1	18.6	1444.5	1	1	1	1	0	1	0	0	0	0	0	0
4	0	51	1	20.3	2002	3	1	1	1	1	0	0	0	1	0	0	1
5	1	47	1	19.8	1614.5	2	0	0	0	1	0	0	0	1	0	0	0
6	0	47	1	37.6	1845.5	3	0	1	1	0	0	0	0	1	0	0	0
7	1	31	1	37.1	1231.5	0	0	0	1	0	0	0	0	0	0	0	0
8	0	59	1	21	1647.5	2	0	0	1	0	0	0	0	0	0	0	0
9	1	26	1	35.4	1241.5	0	1	1	0	1	1	0	0	0	0	1	0
10	0	44	1	35.3	1379	0	1	1	1	0	0	1	0	1	0	0	0
11	1	28	1	35.3	1133	0	1	1	1	1	1	0	0	0	1	1	0
12	0	33	1	35.2	1330	0	0	1	1	1	0	1	0	0	0	0	0
13	1	49	1	35.1	1487.5	1	0	0	1	1	0	0	0	0	0	0	0
14	0	60	1	20.3	1684.5	2	1	1	1	1	0	1	0	1	0	0	0
15	1	39	1	34.8	1111	0	0	0	1	1	0	0	0	0	0	0	0
16	0	50	1	17.6	1400	1	0	1	1	1	0	1	1	1	0	0	0
17	1	52	1	34	1387.5	0	0	0	0	1	1	0	0	0	1	0	0
18	1	45	1	33.9	1381	0	0	1	1	1	1	0	0	1	1	0	0
19	1	29	1	33.9	1193.5	0	0	1	1	1	0	0	0	0	0	0	0
20	0	75	1	18	1533.5	1	0	0	1	1	1	0	0	0	0	0	0
21	0	69	1	33.7	1349	0	0	0	1	1	0	0	0	1	0	0	0
22	1	29	1	33.6	1293.5	0	0	1	0	1	0	0	0	0	0	0	0
23	1	66	1	20.3	1541	1	1	1	1	0	0	0	0	1	0	0	0
24	1	37	1	20.1	1488	1	0	0	1	1	0	0	0	0	0	0	0
25	1	25	1	21.3	1421	1	1	1	1	1	1	0	0	0	0	0	0
26	1	27	1	32.8	1056	0	0	0	0	1	0	0	0	0	0	0	0
27	1	52	1	32.7	1680	2	0	0	1	0	0	0	0	1	0	0	0
28	0	61	1	32.7	1389.5	0	1	1	1	1	1	0	0	0	0	0	0
29	1	50	1	32.7	1393.5	0	1	1	1	1	1	0	0	0	1	1	0
30	1	56	1	21	1660	2	0	0	1	0	0	0	0	1	1	1	0
31	0	72	1	21.3	1951.5	3	0	0	1	0	0	0	0	1	0	0	0
32	1	50	1	32.5	1406	1	1	1	1	1	0	0	0	0	0	1	0
33	1	48	1	32.5	1331	0	0	0	1	1	0	1	1	1	0	0	0
34	0	62	1	22	1466.5	1	0	0	1	1	0	0	0	0	0	0	1
35	1	42	1	32.4	1504.5	1	0	0	1	0	0	0	0	1	0	0	0
36	0	61	1	32.4	1240.5	0	1	1	1	1	0	0	0	0	0	0	1
37	1	47	1	32.3	1767.5	2	0	0	1	1	0	0	0	1	0	0	0
38	1	62	1	32.3	1238	0	0	0	1	1	0	0	0	1	0	0	0
39	1	31	1	32.2	1113	0	0	0	0	1	0	0	0	0	0	0	0
40	1	54	1	32.1	1863.5	3	0	1	1	1	0	0	0	1	0	0	0
41	1	54	1	21.3	2087.5	3	1	1	1	1	0	0	0	0	0	0	0
42	0	63	1	32.1	1328.5	0	1	1	1	1	0	0	0	0	0	0	0
43	1	52	1	32.1	1215.5	0	0	0	1	1	0	0	0	0	0	0	0
44	1	75	1	24.1	2066	3	0	0	1	0	0	1	1	1	0	0	0
45	1	57	1	23.6	1427.5	1	0	0	1	1	1	0	0	1	0	1	0
46	0	65	1	32	1217	0	0	0	1	1	0	0	0	0	0	0	1
47	1	35	1	32	1330	0	0	0	0	1	1	0	0	1	0	0	0
48	1	47	1	26.1	1553	1	1	1	1	1	0	1	1	0	1	1	0
49	1	48	1	31.9	1328.5	0	0	0	1	0	1	0	0	0	0	1	0
50	1	31	1	31.9	1300.5	0	0	0	1	0	0	0	0	0	0	0	0
51	1	46	1	31.8	1642	2	0	1	1	1	1	0	0	0	1	1	1
52	1	47	1	31.8	1596	1	0	0	1	1	1	0	0	0	0	1	0
53	1	42	1	31.8	1124.5	0	1	1	1	1	1	0	0	0	1	0	0
54	1	35	1	31.8	1318.5	0	1	1	1	0	0	0	0	0	0	0	0
55	1	45	1	31.7	1273	0	0	0	1	0	1	0	0	1	1	0	0
56	1	90	1	31.6	2048	3	0	0	1	0	0	0	0	1	0	0	0
57	1	56	1	31.6	1773.5	2	0	0	1	1	1	0	0	1	0	0	0
58	1	46	1	31.6	1524.5	1	0	0	1	1	0	1	0	1	0	0	0
59	0	51	1	31.6	1456.5	1	0	0	1	1	0	0	0	0	0	0	0
60	0	44	1	31.6	1480.5	1	1	1	1	1	0	0	0	1	0	0	0
61	1	43	1	31.5	1345	0	1	1	1	1	0	1	0	0	0	0	0
62	1	43	1	31.5	1328.5	0	1	1	1	1	0	0	0	0	0	0	0
63	1	30	1	31.5	1157.5	0	0	0	1	0	0	0	0	1	0	1	0
64	1	41	1	31.4	1277	0	1	0	1	1	0	0	0	0	0	1	0
65	1	42	1	31.4	1083.5	0	0	0	1	1	0	0	0	0	0	0	0
66	1	33	1	31.3	1442	1	1	1	1	1	0	1	0	1	0	0	0
67	1	39	1	31.2	1772	2	1	1	1	0	0	0	0	1	1	0	0
68	1	54	1	31.2	1469.5	1	1	0	1	1	0	0	0	1	0	1	0
69	1	45	1	31.2	1498	1	0	1	1	0	0	1	0	0	0	1	0
70	1	60	1	31.2	1365	0	0	1	1	0	0	1	1	0	0	1	0
71	1	38	1	31.2	1398	0	1	0	1	1	1	1	0	0	1	1	0
72	1	40	1	31.2	1217	0	0	1	1	0	0	0	0	0	0	0	0
73	1	36	1	31.2	1221.5	0	0	0	1	0	0	0	0	0	0	0	0
74	0	58	1	31.1	1432.5	1	0	0	1	0	0	0	0	0	0	0	0
75	1	53	1	31.1	1271	0	0	0	1	1	0	0	0	0	0	0	0
76	1	42	1	31.1	1083.5	0	0	0	1	0	1	0	0	1	0	1	0
77	1	49	1	31	1322	0	0	0	0	1	0	0	0	1	0	1	0
78	1	37	1	30.9	1652	2	0	0	0	1	0	0	0	1	0	0	0
79	1	49	1	30.9	1536.5	1	0	1	1	1	0	1	0	0	0	1	0
80	1	43	1	30.9	1094	0	0	0	1	1	0	1	0	0	0	1	1
81	1	51	1	30.8	1579	1	0	0	1	1	0	1	0	1	0	0	0
82	1	48	1	30.8	1217	0	1	1	1	1	0	0	0	0	0	1	0
83	1	49	1	30.8	1281	0	0	0	1	0	0	0	0	0	0	0	0
84	0	70	1	30.7	1756.5	2	0	0	1	0	0	0	0	1	0	0	0
85	1	25	1	30.7	1563.5	1	0	0	1	0	0	0	0	0	0	0	0
86	1	58	1	30.7	1258.5	0	0	0	1	1	0	0	0	1	0	0	0
87	1	45	1	30.7	1321	0	1	1	1	0	0	0	0	0	0	0	0
88	1	46	1	30.7	1146.5	0	0	0	1	1	0	0	0	0	0	0	0
89	0	64	1	30.5	1672	2	0	1	1	1	0	1	1	1	0	0	0
90	0	50	1	30.5	1709	2	1	1	1	1	0	0	0	1	0	0	0
91	1	50	1	30.5	1652.5	2	1	0	1	1	0	1	0	0	0	0	0
92	1	34	1	30.5	1364	0	0	1	1	0	0	0	0	0	0	0	1
93	1	50	1	30.5	1236.5	0	0	0	1	1	1	0	0	0	0	1	0
94	1	50	1	30.5	1303	0	0	0	1	1	0	1	0	0	0	0	0
95	1	29	1	30.5	1354	0	1	1	1	1	0	0	0	0	0	0	0
96	0	68	1	30.4	1939.5	3	0	0	1	0	0	0	0	0	0	0	0
97	1	61	1	30.4	1777	2	0	0	1	1	1	0	0	1	0	0	0
98	1	49	1	30.4	1782	2	0	0	1	0	0	1	0	0	0	0	0
99	1	40	1	30.4	1726	2	1	1	1	1	0	0	0	0	0	0	0
100	0	39	1	30.4	1486.5	1	1	1	1	1	0	0	0	1	0	0	1
101	1	39	1	30.4	1594	1	1	1	1	1	0	0	0	0	1	0	0
102	1	47	1	30.4	919.5	0	0	1	1	0	0	0	0	0	0	0	0
103	1	44	1	30.4	1297	0	1	1	1	1	0	0	0	0	1	0	0
104	1	41	1	30.2	1749	2	1	1	1	1	0	0	0	1	1	0	0
105	0	71	1	30.2	1487.5	1	1	1	1	0	0	0	0	0	0	0	0
106	1	35	1	30.2	1454.5	1	0	0	1	0	1	0	0	0	0	0	0
107	1	61	1	30.1	1969	3	0	0	0	0	0	1	0	0	0	0	0
108	1	55	1	30.1	1679.5	2	0	0	1	1	1	0	0	1	0	0	0
109	0	66	1	30.1	1586	1	1	0	1	1	0	0	0	1	0	0	0
110	1	57	1	30.1	1543	1	1	1	1	0	0	1	1	1	1	1	0
111	1	59	1	30.1	1467	1	1	1	1	1	0	0	0	0	1	1	0
112	1	55	1	30.1	1411	1	1	1	1	0	1	0	0	0	0	1	0
113	0	50	1	30.1	1401	1	0	1	1	1	0	0	0	0	0	0	0
114	1	41	1	30.1	1592.5	1	0	0	1	1	0	0	0	1	0	0	0
115	1	55	1	30.1	1373.5	0	0	1	1	1	0	0	0	1	0	1	0
116	1	49	1	30.1	1118	0	1	1	1	1	0	0	0	1	0	0	0
117	1	52	1	30.1	1192	0	1	1	1	1	0	1	0	0	0	0	0
118	1	49	1	30.1	1118	0	1	1	1	1	0	0	0	0	0	0	0
119	1	53	1	30.1	1378	0	0	0	1	1	0	0	0	1	0	0	0
120	1	48	1	30.1	1205	0	0	0	1	1	0	0	0	0	0	0	0
121	1	44	1	30.1	1352.5	0	0	1	1	1	1	0	0	0	0	1	0
122	1	36	1	30.1	1266	0	0	0	1	1	0	0	0	0	0	0	0
123	1	39	1	30.1	1280.5	0	1	0	1	0	0	0	0	0	0	0	0
124	1	43	1	30.1	1113.5	0	0	0	1	0	0	0	0	0	0	0	0
125	1	32	1	30.1	1172	0	1	1	1	1	1	1	0	0	1	0	0
126	0	67	1	30	1747.5	2	1	1	1	1	0	0	0	1	0	0	0
127	1	45	1	30	1635.5	2	0	0	1	0	0	0	0	0	0	0	0
128	1	56	1	30	1571	1	0	0	1	1	0	1	0	1	0	0	0
129	1	40	1	30	1179	0	1	1	1	0	1	0	0	0	0	0	0
130	1	34	1	30	1377	0	1	0	1	1	0	0	0	0	0	0	0
131	1	27	1	30	1281.5	0	0	0	1	0	0	0	0	1	0	0	0
132	0	67	1	29.9	1808.5	3	1	1	1	1	0	0	0	1	0	0	0
133	1	31	1	29.9	1427.5	1	0	0	1	1	0	0	0	0	0	0	0
134	1	70	1	29.8	2209.5	3	0	0	1	0	0	0	0	0	0	0	0
135	1	59	1	29.8	1648.5	2	1	1	1	1	0	0	0	0	0	0	0
136	1	51	1	29.8	1679.5	2	1	1	1	0	0	0	0	0	0	0	0
137	1	43	1	29.8	1644	2	1	1	1	1	1	1	0	1	1	0	0
138	1	43	1	29.8	1594	1	1	0	1	1	1	0	0	0	1	0	1
139	1	53	1	29.8	1499	1	0	0	1	1	0	0	0	1	1	0	0
140	1	51	1	29.8	1481.5	1	1	1	1	1	0	0	0	0	0	0	0
141	1	51	1	29.8	1455	1	1	0	0	1	1	0	0	0	0	0	0
142	1	44	1	29.8	1501.5	1	0	0	0	1	0	0	0	0	0	0	0
143	1	45	1	29.8	1342.5	0	0	1	1	1	0	0	0	0	0	1	0
144	1	46	1	29.8	1325.5	0	0	1	1	1	0	0	0	1	0	0	0
145	1	46	1	29.8	1320	0	1	0	1	1	0	1	0	0	0	0	0
146	1	50	1	29.8	1331.5	0	0	0	1	1	0	0	0	0	0	0	0
147	1	42	1	29.8	1378.5	0	1	1	1	1	0	0	0	0	0	1	0
148	1	42	1	29.8	1192.5	0	0	0	1	1	0	1	0	0	0	1	0
149	1	42	1	29.8	1188	0	0	0	1	1	0	0	0	0	0	0	0
150	1	41	1	29.8	1364.5	0	0	0	1	1	0	0	0	0	0	0	0
151	1	44	1	29.7	1680	2	0	1	1	0	0	0	0	0	0	0	0
152	1	50	1	29.7	1401.5	1	0	0	1	1	1	0	0	1	0	0	0
153	1	63	1	29.7	1352	0	0	1	1	1	0	0	0	0	0	0	0
154	1	60	1	29.7	1203	0	0	0	1	0	0	0	0	0	0	0	0
155	1	49	1	29.7	1352	0	1	1	1	1	0	0	0	0	0	0	0
156	1	46	1	29.7	1350	0	0	1	1	1	0	0	0	0	0	0	0
157	1	47	1	29.7	1228	0	0	0	1	0	0	0	0	1	0	0	0
158	1	50	1	29.7	1227	0	0	0	1	0	0	0	0	0	0	0	0
159	1	34	1	29.7	940	0	0	0	1	1	0	0	0	0	0	0	0
160	0	78	1	29.6	1941	3	0	1	1	0	0	1	1	1	0	0	0
161	1	46	1	29.6	1340	0	0	1	1	1	1	1	0	0	0	0	0
162	0	48	1	29.6	1301	0	0	0	1	1	0	0	0	0	0	0	0
163	1	43	1	29.6	1339	0	1	0	1	1	0	0	0	0	0	0	0
164	1	56	1	29.5	1852	3	0	0	1	0	0	1	0	1	0	0	0
165	1	39	1	29.5	1365.5	0	0	0	1	1	0	0	0	0	0	0	0
166	1	57	1	29.4	1853.5	3	0	0	1	1	0	0	0	1	0	0	0
167	1	57	1	29.4	1853.5	3	0	0	1	1	0	0	0	0	0	0	0
168	0	60	1	29.4	1878	3	0	0	1	1	0	0	0	0	0	0	0
169	1	65	1	29.4	1630.5	2	0	0	1	0	0	0	0	0	0	0	0
170	0	58	1	29.4	1695.5	2	0	1	1	0	0	1	0	1	0	0	0
171	1	55	1	29.4	1689	2	1	1	1	1	0	0	0	0	0	0	0
172	1	48	1	29.4	1753	2	0	0	1	1	0	0	0	1	0	0	0
173	1	74	1	29.4	1525	1	0	0	1	1	0	0	1	1	0	0	0
174	1	58	1	29.4	1544.5	1	0	0	1	1	1	0	0	1	0	0	0
175	1	46	1	29.4	1403.5	1	0	0	0	1	1	0	0	1	0	1	0
176	1	50	1	29.4	1461	1	0	0	1	1	0	1	0	0	0	0	0
177	1	43	1	29.4	1553	1	1	1	1	0	1	1	0	0	1	1	0
178	0	43	1	29.4	1405	1	1	1	1	1	0	0	0	0	0	0	0
179	1	70	1	29.4	1226.5	0	1	1	1	0	0	0	0	0	0	0	0
180	0	56	1	29.4	1276.5	0	0	0	1	0	0	0	0	1	0	1	0
181	1	47	1	29.4	1068	0	1	1	1	0	1	0	0	0	1	0	0
182	1	48	1	29.4	1355	0	1	1	1	1	0	0	0	0	0	0	0
183	1	50	1	29.4	1375.5	0	0	0	0	1	1	0	0	0	0	0	0
184	0	49	1	29.4	1055	0	0	0	1	0	0	0	0	0	0	0	0
185	1	51	1	29.4	1191	0	0	0	1	0	0	0	0	0	0	0	0
186	1	41	1	29.4	1324	0	1	1	1	1	0	0	0	1	0	0	0
187	1	44	1	29.4	1213.5	0	0	0	1	1	1	0	0	0	1	0	0
188	1	40	1	29.4	1271.5	0	1	1	1	1	0	0	0	0	0	0	0
189	1	44	1	29.4	1382	0	1	1	0	0	0	0	0	0	0	1	0
190	1	42	1	29.4	1306.5	0	0	0	1	0	1	0	0	0	1	0	0
191	1	44	1	29.4	1315	0	0	0	1	0	0	0	0	0	1	0	0
192	1	43	1	29.4	1366	0	0	0	0	1	0	0	0	0	0	0	0
193	1	29	1	29.4	1208.5	0	1	1	1	1	0	0	0	0	0	0	0
194	1	34	1	29.4	1375.5	0	1	1	1	1	0	0	0	0	0	0	0
195	0	79	1	29.3	2110.5	3	0	0	1	1	0	1	0	1	0	0	0
196	1	64	1	29.3	2925	3	1	1	1	1	1	0	0	0	0	0	0
197	0	64	1	29.3	1451.5	1	1	0	1	0	0	0	0	0	0	0	0
198	1	47	1	29.3	1539	1	0	0	1	0	0	0	0	0	0	0	0
199	1	49	1	29.3	1370	0	0	0	1	0	0	0	0	0	0	1	0
200	1	47	1	29.3	1166.5	0	0	0	1	0	0	0	0	0	0	0	0
201	0	45	1	29.3	1356.5	0	0	0	1	0	0	0	0	0	0	0	0
202	1	44	1	29.3	1239	0	1	1	1	0	0	0	0	0	0	0	0
203	1	42	1	29.3	1321.5	0	0	0	1	0	0	0	0	0	0	1	0
204	1	28	1	29.3	1310.5	0	1	1	1	1	1	0	0	0	0	0	0
205	1	32	1	29.3	1385.5	0	1	1	1	1	0	0	0	0	0	0	0
206	1	32	1	29.3	1388	0	1	1	1	1	0	0	0	0	0	0	0
207	0	69	1	29.2	1956.5	3	0	0	1	0	0	1	1	0	0	0	0
208	0	63	1	29.2	1616	2	1	1	1	0	0	0	0	1	0	0	0
209	1	74	1	29.1	1676	2	0	0	0	0	0	0	0	1	0	0	0
210	1	57	1	29.1	1675	2	0	1	1	0	0	1	1	1	0	0	0
211	1	57	1	29.1	1783.5	2	0	0	1	1	0	0	0	1	0	0	0
212	1	46	1	29.1	1685.5	2	0	1	1	1	0	1	0	0	0	1	0
213	1	48	1	29.1	1733	2	0	1	1	0	0	0	0	1	0	1	0
214	0	68	1	29.1	1443.5	1	0	0	1	0	0	0	0	1	0	0	1
215	1	53	1	29.1	1558.5	1	0	0	1	1	0	1	0	1	0	1	0
216	1	50	1	29.1	1543	1	0	0	0	1	1	0	0	1	0	1	0
217	1	50	1	29.1	1408.5	1	0	0	1	1	0	0	0	0	0	1	0
218	1	51	1	29.1	1590	1	0	0	1	1	1	0	0	0	0	0	0
219	1	43	1	29.1	1520.5	1	0	0	1	1	0	0	0	0	1	1	0
220	1	33	1	29.1	964	0	0	0	1	0	0	0	0	0	0	0	1
221	1	67	1	29.1	1274.5	0	0	0	1	0	0	0	0	0	0	0	0
222	1	53	1	29.1	1251	0	1	1	0	1	0	0	1	0	0	1	0
223	1	49	1	29.1	1371	0	1	1	1	1	0	0	0	0	0	1	0
224	1	49	1	29.1	1198	0	0	0	1	1	0	0	0	0	0	1	0
225	1	45	1	29.1	1097	0	0	0	1	1	0	0	0	0	1	0	0
226	1	50	1	29.1	1199	0	0	0	1	1	0	0	0	1	0	0	0
227	1	47	1	29.1	1381.5	0	0	0	1	1	1	0	0	0	0	0	0
228	1	47	1	29.1	1280	0	1	0	1	1	0	0	0	0	0	0	0
229	1	45	1	29.1	1283	0	1	0	1	1	0	0	0	0	0	0	0
230	1	50	1	29.1	1153	0	0	0	1	0	0	0	0	0	0	0	0
231	1	52	1	29.1	1241	0	0	0	1	0	0	0	0	0	0	0	0
232	1	42	1	29.1	1265.5	0	0	0	1	1	1	0	0	0	1	0	0
233	1	38	1	29.1	1361	0	0	1	1	1	0	0	0	0	0	0	0
234	1	44	1	29.1	1383.5	0	0	0	1	0	0	0	0	0	0	0	0
235	1	29	1	29.1	1301.5	0	1	1	1	1	1	0	0	0	0	0	0
236	1	32	1	29.1	1233.5	0	0	1	1	1	0	0	0	0	0	1	0
237	1	27	1	29.1	1186.5	0	1	1	1	0	0	0	0	1	0	0	0
238	1	25	1	29.1	1395.5	0	0	1	1	1	0	0	0	0	0	0	0
239	1	74	1	29	2531.5	3	0	0	1	0	0	0	0	0	0	0	0
240	1	48	1	29	1657	2	0	0	1	1	0	0	0	0	0	1	0
241	1	53	1	29	1718	2	0	1	1	0	0	0	0	1	0	0	0
242	1	61	1	29	1434.5	1	1	1	1	0	0	0	0	0	0	0	0
243	1	49	1	29	1476	1	1	1	1	1	0	0	0	0	0	1	0
244	1	38	1	29	1581.5	1	1	1	1	1	0	1	0	1	0	1	0
245	1	47	1	29	1142	0	0	0	1	0	0	0	0	0	1	1	1
246	1	42	1	29	924.5	0	1	1	1	1	0	0	0	0	0	0	1
247	1	53	1	29	1233	0	0	1	1	1	0	0	0	0	0	1	0
248	1	49	1	29	1234.5	0	1	1	1	1	0	0	0	0	0	0	0
249	1	46	1	29	1307	0	0	0	1	0	1	0	0	0	0	1	0
250	1	46	1	29	1356.5	0	0	1	1	0	0	0	0	0	0	0	0
251	1	44	1	29	1260.5	0	1	1	1	1	0	0	0	0	0	0	0
252	1	31	1	29	1244.5	0	1	1	1	1	1	0	0	0	0	0	0
253	1	29	1	29	1278	0	1	1	1	1	0	0	0	0	0	0	0
254	1	25	1	29	1135.5	0	0	0	1	0	0	0	0	0	0	0	0
255	1	45	1	28.9	1279	0	0	0	1	1	0	0	0	0	0	1	0
256	1	69	1	28.8	2458.5	3	0	0	1	0	1	0	1	1	0	0	0
257	0	56	1	28.8	1662.5	2	1	1	1	0	0	0	0	0	0	0	0
258	0	59	1	28.8	1369	0	1	1	1	1	0	0	0	0	0	0	0
259	1	70	1	28.7	1801.5	3	1	1	1	0	1	0	0	0	0	0	0
260	1	80	1	28.7	2035	3	0	0	1	1	1	0	1	0	0	0	0
261	1	71	1	28.7	1891	3	0	0	1	0	0	1	0	1	0	0	0
262	1	61	1	28.7	2125.5	3	0	1	1	0	1	0	0	0	0	0	0
263	1	51	1	28.7	1837.5	3	1	0	0	1	1	0	0	1	0	0	0
264	1	67	1	28.7	1673.5	2	1	1	1	1	0	0	0	1	0	0	0
265	1	45	1	28.7	1667	2	1	1	1	1	1	0	0	1	1	1	0
266	1	50	1	28.7	1783.5	2	0	0	1	1	1	0	0	1	0	0	0
267	1	47	1	28.7	1631	2	1	0	1	1	1	0	0	0	0	0	0
268	1	45	1	28.7	1720.5	2	0	0	1	1	0	0	0	1	0	0	0
269	1	39	1	28.7	1618.5	2	0	0	1	1	1	0	0	0	0	0	0
270	1	42	1	28.7	1604	2	1	0	1	1	0	0	0	0	0	0	0
271	1	58	1	28.7	1416	1	1	1	1	1	0	0	0	0	0	0	0
272	1	55	1	28.7	1529	1	0	1	1	0	0	0	0	0	0	0	0
273	1	53	1	28.7	1581.5	1	0	0	1	0	0	1	0	0	1	1	0
274	1	53	1	28.7	1545.5	1	0	0	0	1	1	0	0	1	0	1	0
275	1	47	1	28.7	1475.5	1	0	0	1	1	1	0	0	0	0	0	0
276	1	54	1	28.7	1478.5	1	0	0	1	1	0	0	0	0	0	0	0
277	1	41	1	28.7	1347	0	0	0	1	1	1	0	0	1	0	1	1
278	1	42	1	28.7	1264	0	0	0	1	1	0	0	0	1	0	1	1
279	1	61	1	28.7	1330.5	0	0	1	1	0	0	0	0	0	0	0	0
280	1	46	1	28.7	1320	0	1	1	1	0	1	0	0	1	0	0	0
281	1	47	1	28.7	1297.5	0	1	1	1	1	0	0	0	1	0	0	0
282	1	50	1	28.7	1332	0	1	1	1	1	1	0	0	0	0	0	0
283	1	50	1	28.7	1386	0	0	0	1	1	1	0	0	1	0	0	0
284	1	48	1	28.7	1311.5	0	1	1	1	1	0	0	0	0	0	0	0
285	1	45	1	28.7	1175.5	0	0	0	1	1	0	0	0	0	0	0	0
286	1	49	1	28.7	1258	0	0	0	1	0	0	0	0	0	0	0	0
287	1	36	1	28.7	1188	0	1	1	1	1	1	0	0	0	0	0	0
288	1	39	1	28.7	1328	0	1	1	1	1	1	0	0	0	0	0	0
289	1	42	1	28.7	1140.5	0	1	1	1	1	0	0	0	0	0	0	0
290	1	42	1	28.7	1340.5	0	0	0	1	0	0	0	0	0	0	0	0
291	1	33	1	28.7	1079.5	0	0	0	1	1	0	0	0	0	0	0	0
292	1	33	1	28.7	1393.5	0	0	0	1	0	0	0	0	0	0	0	0
293	0	72	1	28.6	1948.5	3	0	0	1	0	0	1	1	0	0	0	0
294	1	52	1	28.6	1803.5	3	0	0	1	1	0	0	0	0	0	0	0
295	0	55	1	28.6	1416.5	1	1	1	1	1	0	0	0	0	0	0	0
296	1	39	1	28.6	1128.5	0	0	1	1	0	0	0	0	0	0	0	1
297	0	57	1	28.6	1335	0	0	0	1	1	0	0	0	1	0	0	0
298	0	54	1	28.6	1292.5	0	0	1	1	0	0	0	0	0	0	0	0
299	0	66	1	28.5	1864	3	1	1	1	1	0	0	0	1	0	0	0
300	0	47	1	28.5	1583.5	1	0	1	1	1	0	0	0	1	0	0	0
301	0	53	1	28.5	1548.5	1	0	0	1	0	0	0	0	0	0	0	0
302	0	49	1	28.5	1569	1	0	0	1	0	0	0	0	0	0	0	0
303	0	58	1	28.4	2042.5	3	1	1	1	0	0	0	0	0	0	0	0
304	1	58	1	28.4	1831.5	3	0	0	1	1	0	0	0	0	0	0	0
305	1	47	1	28.4	1828	3	1	1	1	1	0	1	0	1	0	1	0
306	1	39	1	28.4	1823	3	0	0	1	0	0	0	1	1	0	0	0
307	1	51	1	28.4	1724	2	1	0	1	1	0	0	0	0	1	1	1
308	1	49	1	28.4	1764.5	2	0	0	1	1	0	1	0	0	0	0	0
309	1	48	1	28.4	1702	2	0	0	1	1	0	1	0	0	0	0	0
310	1	59	1	28.4	1451.5	1	1	0	1	1	1	1	1	0	0	0	0
311	1	56	1	28.4	1404.5	1	0	0	1	1	0	0	0	1	0	0	0
312	0	55	1	28.4	1539.5	1	0	0	1	0	0	0	0	1	0	0	0
313	1	50	1	28.4	1475	1	1	1	1	1	0	1	0	1	0	0	0
314	1	50	1	28.4	1475	1	1	1	1	1	0	1	0	1	0	0	0
315	1	45	1	28.4	1476	1	0	0	0	1	1	1	0	0	1	0	0
316	1	51	1	28.4	1599	1	0	0	1	1	1	0	0	1	0	0	0
317	1	50	1	28.4	1520.5	1	1	1	1	0	0	0	0	0	0	0	0
318	1	42	1	28.4	1458	1	0	1	1	1	0	0	0	0	0	0	0
319	1	41	1	28.4	1410	1	0	0	1	1	0	0	0	0	0	0	0
320	1	34	1	28.4	1054	0	0	0	1	0	0	0	0	0	0	0	1
321	1	55	1	28.4	1270	0	0	0	1	0	0	0	0	0	0	0	0
322	1	49	1	28.4	1358	0	0	0	1	1	0	0	1	1	1	1	0
323	1	48	1	28.4	1368.5	0	1	1	1	0	1	0	0	1	0	1	0
324	1	52	1	28.4	1211.5	0	1	1	1	1	0	0	0	0	0	1	0
325	1	47	1	28.4	1115.5	0	1	1	1	1	0	0	0	0	0	0	0
326	1	48	1	28.4	1376	0	0	0	1	1	0	0	0	0	0	1	0
327	0	47	1	28.4	1375	0	0	0	1	1	0	0	0	1	0	0	0
328	1	42	1	28.4	1126.5	0	1	1	1	1	0	0	0	0	1	1	0
329	1	41	1	28.4	1169	0	1	1	1	1	1	0	0	0	0	0	0
330	1	42	1	28.4	1177	0	1	1	1	0	0	0	0	0	0	1	0
331	1	37	1	28.4	1205	0	1	1	1	1	0	0	0	0	0	0	0
332	1	37	1	28.4	1236.5	0	1	1	1	1	0	0	0	0	0	0	0
333	1	41	1	28.4	1295	0	1	0	1	1	0	0	0	0	0	0	0
334	1	32	1	28.4	1309.5	0	1	1	1	1	0	1	0	0	0	0	0
335	1	32	1	28.4	1309.5	0	1	1	1	1	0	1	0	0	0	0	0
336	1	30	1	28.4	1340	0	1	1	1	1	0	0	0	0	0	0	0
337	1	70	1	28.3	2273.5	3	1	1	1	1	0	1	0	1	0	0	0
338	1	57	1	28.3	1634	2	0	1	1	0	1	0	0	0	0	0	0
339	0	39	1	28.3	1632.5	2	1	1	1	0	0	0	0	1	1	0	0
340	1	44	1	28.3	1679	2	0	0	1	0	0	0	0	0	0	0	0
341	1	63	1	28.3	1592	1	0	0	1	0	0	0	1	0	0	0	0
342	1	53	1	28.3	1468	1	0	1	1	1	0	0	0	1	0	0	0
343	1	51	1	28.3	1556.5	1	0	0	1	1	0	1	0	0	0	0	0
344	1	50	1	28.3	1463.5	1	0	0	1	0	0	0	0	1	0	0	0
345	1	48	1	28.3	1435.5	1	0	0	1	0	0	0	0	0	0	0	0
346	1	39	1	28.3	1411	1	0	0	1	1	0	1	0	0	0	0	0
347	1	63	1	28.3	1167	0	0	0	1	0	0	0	0	0	0	0	0
348	1	51	1	28.3	1205	0	1	1	1	1	0	0	0	0	0	0	0
349	1	50	1	28.3	1361.5	0	0	0	1	0	1	0	0	0	0	1	0
350	1	54	1	28.3	1277.5	0	1	0	0	1	0	0	0	1	0	0	0
351	0	50	1	28.3	890	0	0	0	1	0	0	0	0	0	0	0	0
352	1	44	1	28.3	1144.5	0	1	1	1	1	1	0	0	1	1	1	0
353	1	41	1	28.3	1095.5	0	0	0	1	1	0	0	0	0	0	0	0
354	1	39	1	28.3	1141	0	0	0	1	1	0	0	0	0	0	0	0
355	1	41	1	28.3	1384	0	0	0	1	0	0	0	0	0	0	0	0
356	1	21	1	28.3	1338	0	0	0	1	0	0	0	0	1	0	0	0
357	0	33	1	28.3	740	0	0	0	1	1	0	0	0	0	0	0	0
358	1	54	1	28.2	1683.5	2	0	1	1	0	0	0	0	0	0	0	0
359	0	51	1	28.2	1563	1	1	1	1	1	0	0	0	1	0	0	0
360	1	54	1	28.2	1252	0	1	1	1	0	0	1	1	0	1	0	0
361	1	50	1	28.2	1337	0	1	1	1	0	0	0	0	0	0	0	0
362	1	37	1	28.2	1295	0	0	0	1	1	0	0	0	0	0	0	0
363	1	45	1	28.1	1828	3	1	1	1	0	1	0	0	0	0	0	0
364	1	72	1	28.1	1717.5	2	1	1	1	1	0	0	0	0	0	1	0
365	1	73	1	28.1	1683	2	0	0	1	0	0	0	0	1	0	0	0
366	1	50	1	28.1	1685	2	0	0	1	1	1	0	0	0	0	0	0
367	1	40	1	28.1	1643	2	1	1	1	0	0	0	0	0	1	1	0
368	0	57	1	28.1	1578	1	0	0	1	0	0	0	0	0	0	0	0
369	1	50	1	28.1	1473.5	1	0	0	1	1	1	1	1	1	1	0	0
370	0	46	1	28.1	1406.5	1	1	1	1	1	0	1	0	0	0	0	0
371	1	50	1	28.1	1587.5	1	0	0	1	0	0	1	1	1	0	0	0
372	1	47	1	28.1	1493.5	1	0	0	1	1	0	1	0	0	0	0	0
373	1	45	1	28.1	1542.5	1	0	0	1	1	0	0	0	0	0	0	0
374	0	49	1	28.1	1508	1	0	0	1	0	0	0	0	0	0	0	0
375	0	35	1	28.1	1550	1	0	0	1	1	0	0	0	1	0	0	0
376	1	56	1	28.1	1357	0	0	0	0	1	0	1	0	1	0	0	0
377	1	64	1	28.1	1235	0	0	1	1	0	1	0	0	0	0	0	0
378	1	43	1	28.1	1257	0	1	1	1	1	0	1	1	0	0	1	0
379	1	38	1	28.1	1315	0	0	1	1	1	0	0	0	0	1	1	0
380	1	43	1	28.1	1343	0	1	0	1	1	0	0	0	0	0	0	0
381	1	42	1	28.1	1241.5	0	0	0	0	1	1	0	0	0	0	0	0
382	1	39	1	28.1	1248	0	0	0	1	0	0	0	0	0	0	0	0
383	1	23	1	28.1	1278	0	0	0	1	1	0	0	0	0	0	0	0
384	0	67	1	28	2403	3	0	0	1	0	0	1	1	1	0	0	0
385	1	61	1	28	2058	3	0	0	1	0	0	0	0	1	0	0	0
386	1	59	1	28	1612	2	1	1	1	0	0	0	0	0	0	0	0
387	1	46	1	28	1725.5	2	0	0	1	1	1	0	0	0	1	0	0
388	0	54	1	28	1757.5	2	1	1	1	0	0	0	0	1	0	0	0
389	0	54	1	28	1676.5	2	1	1	1	0	0	0	0	0	0	0	0
390	0	55	1	28	1499	1	1	1	1	0	0	1	1	0	0	0	0
391	1	56	1	28	1405	1	0	0	1	1	0	0	0	0	1	1	0
392	1	55	1	28	1433.5	1	0	0	1	1	0	1	0	0	0	1	0
393	1	58	1	28	1439	1	0	0	0	1	0	0	0	1	0	1	0
394	1	56	1	28	1405	1	0	0	1	1	0	0	0	0	0	1	0
395	1	58	1	28	1451.5	1	0	0	1	0	0	0	0	0	0	0	0
396	0	49	1	28	1460.5	1	0	0	1	1	0	0	0	1	0	0	0
397	1	42	1	28	1489.5	1	0	0	1	0	0	0	0	0	0	0	0
398	1	43	1	28	1548.5	1	0	0	1	0	0	0	0	0	0	0	0
399	1	52	1	28	1201.5	0	0	1	1	1	0	0	0	0	0	1	1
400	1	66	1	28	1254.5	0	0	0	1	0	0	0	0	1	0	0	0
401	0	47	1	28	1237.5	0	1	1	1	1	0	0	0	0	0	0	0
402	1	49	1	28	1310.5	0	0	0	1	1	0	0	0	0	0	1	0
403	1	20	1	28	1124	0	1	1	1	0	0	0	0	0	0	0	0
404	0	30	1	28	1301	0	1	1	1	0	0	0	0	0	0	0	0
405	1	65	1	27.9	1745.5	2	1	1	1	0	0	0	0	1	0	0	0
406	1	55	1	27.9	1645.5	2	0	1	1	0	0	0	0	1	0	0	0
407	0	54	1	27.9	1646.5	2	0	0	0	0	0	1	1	0	0	0	0
408	1	45	1	27.9	1482.5	1	0	1	1	0	1	0	0	0	0	0	0
409	1	47	1	27.9	1507	1	0	1	1	1	0	0	0	0	0	0	0
410	1	50	1	27.9	1484	1	0	0	1	0	0	1	0	0	0	0	0
411	1	78	1	27.9	1242.5	0	0	0	1	0	0	0	0	1	0	0	0
412	1	48	1	27.9	1313.5	0	0	0	1	1	0	1	0	0	0	0	0
413	1	49	1	27.9	1386	0	0	1	1	1	0	0	0	0	0	0	0
414	1	44	1	27.9	1384	0	0	0	1	1	0	0	0	1	0	0	0
415	1	34	1	27.9	1397	0	0	0	1	1	0	0	0	0	0	0	0
416	1	53	1	27.8	1893	3	0	0	1	1	0	1	1	1	0	0	0
417	0	60	1	27.8	1739	2	1	1	1	0	0	0	0	1	0	0	0
418	1	50	1	27.8	1751	2	1	0	1	1	1	0	0	0	0	0	0
419	1	48	1	27.8	1726.5	2	0	0	1	1	0	0	0	1	0	0	0
420	1	55	1	27.8	1593.5	1	0	1	1	1	0	0	0	0	0	0	0
421	1	46	1	27.8	1410.5	1	1	1	1	1	0	0	0	0	0	0	0
422	1	47	1	27.8	1409.5	1	0	0	1	1	0	0	0	0	0	0	0
423	0	51	1	27.8	1543	1	0	0	1	0	0	0	0	0	0	0	0
424	1	44	1	27.8	1552	1	0	1	1	1	0	0	0	0	0	0	0
425	1	39	1	27.8	1402	1	0	0	1	0	0	0	0	1	0	0	0
426	1	57	1	27.8	1377.5	0	0	0	0	1	0	0	0	1	0	0	0
427	1	46	1	27.8	1272	0	1	0	1	1	0	1	1	0	0	0	0
428	1	50	1	27.8	1320.5	0	0	0	1	1	0	0	0	0	0	0	0
429	1	37	1	27.8	1224.5	0	0	0	1	0	1	0	1	1	1	1	0
430	1	36	1	27.8	1224.5	0	1	1	1	0	0	0	0	0	0	1	0
431	1	18	1	27.8	1251.5	0	0	0	1	0	1	0	0	0	0	0	0
432	1	33	1	27.8	1257	0	0	1	1	0	0	0	0	0	0	0	0
433	1	34	1	27.8	1122.5	0	0	0	1	0	0	0	0	0	0	0	0
434	1	27	1	27.8	1170	0	0	0	1	0	0	0	0	0	0	0	0
435	1	28	1	27.8	1234.5	0	0	0	1	0	0	0	0	0	0	0	0
436	0	72	1	27.7	2404	3	1	1	1	1	0	1	0	1	0	0	0
437	0	69	1	27.7	1835	3	0	0	1	0	0	0	0	0	0	0	0
438	0	57	1	27.7	1994	3	0	0	1	1	0	1	1	1	0	0	0
439	0	63	1	27.7	2051	3	0	0	1	1	0	1	0	1	0	0	0
440	1	56	1	27.7	1707	2	0	1	1	0	0	0	0	1	0	0	0
441	1	61	1	27.7	1790.5	2	0	0	1	0	0	0	0	1	0	0	0
442	1	48	1	27.7	1707	2	0	0	1	1	0	1	0	1	0	1	0
443	1	35	1	27.7	1607.5	2	0	0	1	1	0	0	0	0	0	0	0
444	1	65	1	27.7	1422.5	1	0	0	0	0	1	0	0	1	0	0	0
445	1	56	1	27.7	1598	1	1	1	1	0	0	1	1	1	0	0	0
446	1	56	1	27.7	1555	1	0	0	1	1	0	0	0	1	0	1	0
447	1	56	1	27.7	1555	1	0	0	1	1	0	0	0	1	1	0	0
448	1	51	1	27.7	1405.5	1	0	0	0	1	1	0	0	1	0	1	0
449	1	50	1	27.7	1528	1	1	0	0	1	1	0	0	0	1	0	0
450	1	48	1	27.7	1446	1	0	0	1	1	1	0	0	0	0	0	0
451	1	49	1	27.7	1426.5	1	0	0	1	0	0	0	0	1	0	0	0
452	1	54	1	27.7	1505	1	0	0	1	0	0	0	0	1	0	0	0
453	1	50	1	27.7	1576.5	1	0	0	1	0	0	0	0	1	0	0	0
454	1	49	1	27.7	1562.5	1	0	0	1	1	0	0	0	0	0	0	0
455	1	34	1	27.7	1471.5	1	1	1	1	1	1	0	0	0	1	0	0
456	1	55	1	27.7	1371	0	1	1	1	1	0	0	0	0	1	0	1
457	1	39	1	27.7	1103	0	0	0	1	0	0	0	0	0	1	0	1
458	1	38	1	27.7	1364.5	0	0	0	1	0	0	0	0	0	0	0	1
459	1	72	1	27.7	1240	0	0	0	1	0	1	0	0	0	0	0	0
460	1	57	1	27.7	1351.5	0	0	0	1	0	0	0	0	0	0	0	0
461	1	48	1	27.7	1282	0	1	1	1	1	0	0	0	0	1	1	0
462	1	52	1	27.7	1385	0	1	0	1	1	0	0	0	0	0	0	0
463	1	49	1	27.7	1183.5	0	0	0	0	1	0	0	0	1	0	0	0
464	1	45	1	27.7	1367.5	0	0	0	1	0	1	0	0	0	0	0	0
465	1	45	1	27.7	1318	0	0	0	0	1	0	0	0	0	0	0	0
466	1	50	1	27.7	1149	0	0	0	1	0	0	0	0	0	0	0	0
467	1	47	1	27.7	1277	0	0	0	1	0	0	0	0	0	0	0	0
468	1	35	1	27.7	1237.5	0	1	1	0	1	0	0	0	0	0	1	0
469	1	42	1	27.7	1172.5	0	1	1	1	1	0	0	0	0	0	0	0
470	1	35	1	27.7	1199	0	0	0	1	1	0	0	0	0	0	1	0
471	1	41	1	27.7	1274.5	0	0	0	1	1	0	0	0	0	0	0	0
472	1	39	1	27.7	1328	0	0	0	1	1	0	0	0	0	0	0	0
473	1	41	1	27.7	1382	0	0	0	1	0	0	0	0	0	0	0	0
474	1	31	1	27.7	1136	0	1	1	1	1	0	0	0	0	0	0	0
475	0	72	1	27.6	2144.5	3	1	1	1	1	0	1	0	1	0	0	0
476	1	73	1	27.6	2236	3	1	1	1	1	0	0	0	1	0	0	0
477	0	59	1	27.6	2189	3	1	1	1	1	1	0	1	1	0	0	0
478	0	62	1	27.6	1909	3	0	0	1	0	0	1	1	1	0	0	0
479	0	71	1	27.6	1788.5	2	0	0	1	1	0	0	0	0	0	0	0
480	1	46	1	27.6	1601	2	0	0	0	1	1	0	0	1	0	0	0
481	1	79	1	27.6	1572.5	1	0	0	1	1	1	0	0	1	0	0	0
482	1	65	1	27.6	1525	1	0	1	1	0	0	0	0	0	0	1	0
483	1	55	1	27.6	1582.5	1	0	0	1	1	1	0	0	1	1	0	0
484	0	57	1	27.6	1404.5	1	1	1	1	0	0	0	0	0	0	0	0
485	1	55	1	27.6	1599.5	1	0	0	1	0	0	0	0	1	0	0	0
486	1	50	1	27.6	1410	1	0	0	1	1	0	0	0	1	0	0	0
487	1	54	1	27.6	1462.5	1	0	1	0	0	0	0	0	0	0	0	0
488	1	37	1	27.6	1433.5	1	0	0	1	0	0	0	0	0	0	1	0
489	1	50	1	27.6	1097	0	0	0	1	1	1	1	0	1	0	0	1
490	1	45	1	27.6	1309	0	0	0	1	1	0	0	0	0	1	1	0
491	0	42	1	27.6	1270	0	0	0	1	1	0	1	0	0	0	0	0
492	1	40	1	27.6	1231	0	1	0	1	1	0	0	0	0	0	0	0
493	0	68	1	27.5	2487	3	0	0	1	0	0	0	0	0	0	0	0
494	1	61	1	27.5	1803	3	0	1	1	1	0	0	0	1	0	1	0
495	1	64	1	27.5	1821.5	3	0	0	1	0	0	0	0	1	0	0	0
496	1	50	1	27.5	2099	3	0	1	1	0	0	0	0	1	0	0	0
497	1	49	1	27.5	1691.5	2	0	0	0	1	0	0	0	1	0	0	0
498	1	42	1	27.5	1625	2	1	1	1	1	0	0	0	0	0	0	0
499	1	41	1	27.5	1634	2	1	1	1	1	0	0	0	0	0	0	0
500	1	65	1	27.5	1446.5	1	1	1	1	1	0	0	0	1	0	0	0
501	1	55	1	27.5	1546	1	1	1	1	0	0	0	0	0	0	0	0
502	1	50	1	27.5	1404.5	1	1	1	1	1	1	0	0	0	1	1	0
503	1	50	1	27.5	1593.5	1	1	1	1	0	1	0	0	0	1	0	0
504	1	31	1	27.5	1484.5	1	1	1	1	1	1	0	0	0	1	1	0
505	1	31	1	27.5	984.5	0	0	0	1	0	0	0	0	0	0	1	1
506	1	58	1	27.5	1193.5	0	0	0	1	0	0	1	0	0	0	1	0
507	1	56	1	27.5	1377.5	0	0	1	1	1	0	0	0	0	0	0	0
508	0	55	1	27.5	1305	0	1	0	1	1	0	0	0	0	0	0	0
509	1	45	1	27.5	1142	0	1	1	1	0	0	0	0	1	1	1	0
510	1	54	1	27.5	1294	0	1	1	1	1	0	0	0	0	1	0	0
511	1	48	1	27.5	1389	0	1	1	1	0	0	1	1	0	0	0	0
512	1	50	1	27.5	1245.5	0	1	0	1	1	0	0	0	0	0	0	0
513	1	48	1	27.5	1198.5	0	0	0	1	0	0	0	0	0	0	1	0
514	1	35	1	27.5	1125.5	0	1	1	1	1	0	0	0	0	1	0	0
515	1	40	1	27.5	1343.5	0	1	1	1	1	0	0	0	0	1	0	0
516	1	42	1	27.5	1213	0	0	0	1	1	0	0	0	0	0	0	0
517	1	44	1	27.5	1216.5	0	1	0	1	0	0	0	0	0	0	0	0
518	1	42	1	27.5	1173	0	0	0	1	0	0	0	0	0	0	0	0
519	1	26	1	27.5	1118	0	1	1	1	1	1	0	0	0	1	0	0
520	1	34	1	27.5	1234.5	0	0	0	1	1	1	0	0	0	0	0	0
521	1	71	1	27.4	2219.5	3	1	1	1	0	0	0	0	0	0	0	0
522	1	63	1	27.4	1670.5	2	0	0	1	1	0	0	0	1	0	0	0
523	1	49	1	27.4	1763.5	2	1	1	1	0	0	1	0	0	0	0	0
524	1	52	1	27.4	1639.5	2	0	0	0	1	1	0	0	0	0	0	0
525	1	42	1	27.4	1688	2	1	1	1	1	0	0	0	0	0	0	0
526	1	64	1	27.4	1403.5	1	1	0	1	1	0	0	0	1	0	0	0
527	1	46	1	27.4	1456.5	1	1	1	1	1	0	0	0	1	0	0	0
528	1	47	1	27.4	1554.5	1	0	0	1	1	0	0	0	0	0	0	0
529	1	34	1	27.4	1469.5	1	0	1	1	0	1	0	0	0	0	0	0
530	1	32	1	27.4	1460.5	1	0	0	1	1	0	0	0	0	0	0	0
531	1	37	1	27.4	1230.5	0	0	1	1	1	0	0	0	0	1	0	1
532	1	37	1	27.4	1231	0	1	0	1	1	0	0	0	0	1	0	1
533	0	44	1	27.4	1242.5	0	0	0	1	0	0	0	0	0	0	0	1
534	1	55	1	27.4	1266	0	0	0	1	1	0	0	0	0	0	0	0
535	1	49	1	27.4	1159.5	0	1	1	1	1	0	0	0	0	1	1	0
536	1	50	1	27.4	1376	0	1	1	1	1	0	1	0	1	0	0	0
537	1	48	1	27.4	1358.5	0	1	0	1	1	0	0	0	0	0	1	0
538	1	45	1	27.4	1307.5	0	1	0	1	1	0	0	0	0	0	0	0
539	0	53	1	27.4	980.5	0	0	1	1	0	0	0	0	0	0	0	0
540	1	41	1	27.4	1286.5	0	1	1	1	1	0	0	0	0	0	0	0
541	1	44	1	27.4	1334	0	0	0	1	0	1	0	0	0	1	0	0
542	0	38	1	27.4	1345	0	0	0	0	1	0	0	0	0	0	0	0
543	1	36	1	27.4	1163.5	0	0	0	1	0	0	0	0	0	0	0	0
544	0	36	1	27.4	1285	0	0	0	1	0	0	0	0	0	0	0	0
545	1	31	1	27.4	1192	0	0	1	1	1	0	0	0	0	0	0	0
546	1	26	1	27.4	1098	0	0	1	1	0	0	0	0	0	0	0	0
547	0	34	1	27.4	1389	0	0	0	1	0	0	0	0	0	0	0	0
548	1	49	1	27.3	1946.5	3	0	0	1	1	0	0	0	1	1	1	1
549	1	46	1	27.3	1849	3	0	0	1	0	1	0	0	1	0	0	1
550	1	47	1	27.3	1867.5	3	1	1	1	1	1	0	0	1	0	0	0
551	1	60	1	27.3	1745	2	0	0	1	1	0	0	0	1	0	1	0
552	1	59	1	27.3	1741.5	2	0	0	1	0	0	0	0	0	0	0	0
553	1	47	1	27.3	1678	2	1	0	1	1	0	1	0	1	0	0	0
554	1	60	1	27.3	1444.5	1	0	0	1	0	0	0	0	0	0	0	0
555	1	45	1	27.3	1457	1	1	1	1	1	0	0	0	1	0	0	0
556	1	50	1	27.3	1486	1	1	0	1	0	1	0	0	0	0	1	0
557	1	48	1	27.3	1468	1	1	1	1	0	1	0	0	0	0	0	0
558	1	49	1	27.3	1471	1	0	1	1	0	1	0	0	0	0	0	0
559	1	52	1	27.3	1463.5	1	0	0	1	0	0	0	0	0	0	0	0
560	1	44	1	27.3	1570	1	0	0	1	1	1	0	0	0	1	1	0
561	0	61	1	27.3	1336.5	0	0	0	1	0	0	1	0	0	0	0	1
562	1	45	1	27.3	1225.5	0	0	0	1	1	0	0	0	0	0	0	1
563	0	56	1	27.3	1329.5	0	0	0	1	0	0	0	0	0	0	0	0
564	1	48	1	27.3	1249	0	0	0	1	1	1	0	0	1	1	0	0
565	1	49	1	27.3	1385	0	0	0	1	1	0	1	0	1	0	0	0
566	0	48	1	27.3	1210.5	0	1	1	1	1	0	0	0	0	0	0	0
567	1	46	1	27.3	1271	0	0	0	0	1	0	0	0	0	1	1	0
568	1	47	1	27.3	1167.5	0	0	0	1	0	0	0	0	0	0	1	0
569	1	50	1	27.3	1279.5	0	0	0	1	0	0	0	0	1	0	0	0
570	1	51	1	27.3	1324.5	0	0	0	1	1	0	0	0	0	0	0	0
571	0	47	1	27.3	1210	0	0	1	1	0	0	0	0	0	0	0	0
572	0	48	1	27.3	962.5	0	0	0	1	0	0	0	0	0	0	0	0
573	0	50	1	27.3	1196	0	0	0	1	0	0	0	0	0	0	0	0
574	1	47	1	27.3	1218.5	0	0	0	1	0	0	0	0	0	0	0	0
575	1	35	1	27.3	1305.5	0	1	1	1	1	1	0	0	0	1	1	0
576	1	43	1	27.3	1252	0	1	1	1	1	0	0	0	0	0	0	0
577	1	37	1	27.3	1265	0	1	1	1	1	0	0	0	0	0	0	0
578	1	41	1	27.3	1269	0	1	1	1	1	0	0	0	0	0	0	0
579	1	37	1	27.3	1181.5	0	0	0	1	0	0	0	0	0	0	1	0
580	1	40	1	27.3	1207	0	0	0	1	1	0	0	0	0	0	0	0
581	1	43	1	27.3	1193.5	0	0	1	1	0	0	0	0	0	0	0	0
582	0	81	1	27.2	1805.5	3	0	1	1	0	0	0	0	1	0	0	0
583	1	78	1	27.2	2674	3	0	0	1	0	0	0	0	1	0	0	0
584	1	58	1	27.2	1872.5	3	0	0	1	1	0	1	1	1	0	0	0
585	0	57	1	27.2	1856	3	1	1	1	0	0	0	0	0	0	0	0
586	0	70	1	27.2	1711	2	1	1	1	0	0	0	0	0	0	0	0
587	1	63	1	27.2	1685	2	1	0	1	1	1	0	0	0	0	0	0
588	1	54	1	27.2	1604.5	2	1	1	1	1	0	0	0	1	0	0	0
589	0	50	1	27.2	1643	2	0	0	1	1	0	0	0	0	0	0	0
590	1	61	1	27.2	1422	1	0	0	1	0	0	1	1	0	0	0	0
591	0	61	1	27.2	1574.5	1	0	0	1	0	0	0	0	0	0	0	0
592	1	48	1	27.2	1448	1	1	0	1	1	0	0	0	0	0	0	0
593	1	39	1	27.2	1431.5	1	1	0	1	1	0	0	0	0	0	0	0
594	1	55	1	27.2	1211.5	0	0	1	1	0	0	0	0	0	1	0	1
595	0	56	1	27.2	1148	0	1	0	1	0	0	0	1	0	0	0	0
596	1	51	1	27.2	1280.5	0	1	1	1	1	1	0	0	0	0	1	0
597	0	49	1	27.2	1316	0	1	1	1	1	0	1	0	0	0	0	0
598	0	51	1	27.2	1390.5	0	1	1	1	1	0	1	0	0	0	0	0
599	1	47	1	27.2	1294.5	0	0	0	1	0	0	0	0	0	0	0	0
600	1	43	1	27.2	1209.5	0	1	1	1	1	1	0	0	0	1	0	0
601	0	74	1	27.1	2535.5	3	0	0	1	1	0	1	0	1	0	0	0
602	0	63	1	27.1	1825	3	1	1	1	1	0	0	0	0	0	0	0
603	1	57	1	27.1	1804	3	0	0	1	1	0	0	0	0	0	0	0
604	1	71	1	27.1	1693.5	2	0	0	1	1	0	1	0	1	0	0	0
605	0	60	1	27.1	1733	2	0	0	1	1	0	0	0	1	0	0	0
606	0	59	1	27.1	1515.5	1	1	1	1	0	0	0	0	0	0	0	0
607	0	55	1	27.1	1572.5	1	1	1	1	0	0	0	0	0	0	0	0
608	1	51	1	27.1	1492	1	1	1	1	1	0	0	0	0	0	0	0
609	1	49	1	27.1	1409	1	0	0	1	1	0	0	0	0	0	1	0
610	1	51	1	27.1	1492.5	1	0	0	1	1	0	1	0	0	0	0	0
611	1	53	1	27.1	1446.5	1	0	1	1	0	0	1	0	0	0	0	0
612	1	51	1	27.1	1511	1	0	0	1	1	0	0	0	0	0	0	0
613	1	43	1	27.1	1490.5	1	1	1	1	1	0	0	0	0	0	0	0
614	1	48	1	27.1	1166	0	1	0	1	1	0	0	0	0	0	1	0
615	1	48	1	27.1	1353	0	1	0	1	1	0	0	0	0	0	0	0
616	1	41	1	27.1	1163	0	1	1	1	1	0	0	0	0	0	0	0
617	1	41	1	27.1	1299.5	0	0	1	1	0	0	0	0	0	1	0	0
618	1	40	1	27.1	1125.5	0	0	0	1	1	0	0	0	0	0	0	0
619	1	42	1	27.1	1333	0	0	1	1	0	0	0	0	0	0	0	0
620	0	41	1	27.1	1108	0	0	0	1	0	0	0	0	0	0	0	0
621	1	56	1	27	1606	2	1	1	1	1	0	0	0	0	0	1	0
622	1	52	1	27	1611	2	1	1	1	0	1	1	0	0	1	1	0
623	1	51	1	27	1614	2	0	0	1	1	0	1	1	0	0	0	0
624	1	49	1	27	1493.5	1	0	0	1	1	0	0	0	1	0	1	1
625	1	50	1	27	1574	1	1	1	1	0	0	0	0	1	0	1	0
626	1	52	1	27	1560.5	1	0	0	1	1	0	0	0	1	1	0	0
627	0	48	1	27	1411	1	0	0	1	1	0	0	0	1	0	0	0
628	1	44	1	27	1540.5	1	1	0	1	1	0	1	0	0	1	0	0
629	1	44	1	27	1533.5	1	0	0	1	1	1	0	0	0	0	1	0
630	1	38	1	27	1453	1	0	1	1	1	0	0	0	0	0	0	0
631	1	55	1	27	1319.5	0	1	1	1	0	1	0	0	1	0	0	0
632	1	59	1	27	1149.5	0	1	1	1	1	0	0	0	0	0	0	0
633	1	57	1	27	1129.5	0	0	0	1	0	0	0	0	0	0	0	0
634	1	48	1	27	1299	0	1	1	1	1	0	1	0	0	0	1	0
635	1	49	1	27	1147.5	0	1	1	1	1	0	0	0	0	0	1	0
636	0	50	1	27	1197	0	0	0	1	0	0	0	0	0	0	0	0
637	1	48	1	27	1220	0	0	0	1	0	0	0	0	0	0	0	0
638	1	42	1	27	1318.5	0	1	0	1	1	1	0	0	0	0	0	0
639	1	40	1	27	1279.5	0	0	1	1	1	0	0	0	0	0	0	0
640	1	42	1	27	1129.5	0	0	0	1	0	0	0	0	0	0	0	0
641	1	71	1	26.9	1802	3	0	0	1	0	0	0	0	0	0	0	0
642	0	60	1	26.9	1990	3	0	0	1	0	1	1	1	1	0	0	0
643	1	58	1	26.9	1917.5	3	0	0	1	1	0	0	0	1	0	0	0
644	1	50	1	26.9	1630	2	0	0	1	1	0	0	0	1	0	1	0
645	1	47	1	26.9	1624.5	2	0	1	1	1	0	0	0	1	0	0	0
646	1	47	1	26.9	1736	2	1	1	1	0	0	0	0	0	0	0	0
647	1	59	1	26.9	1449	1	1	1	1	1	0	0	0	0	0	0	0
648	1	50	1	26.9	1445.5	1	0	0	1	1	0	0	0	0	1	0	0
649	1	43	1	26.9	1552	1	1	1	1	1	0	0	0	0	0	0	0
650	1	57	1	26.9	1382	0	0	0	1	0	0	0	0	0	0	0	0
651	1	51	1	26.9	1393	0	1	1	1	1	1	0	0	0	0	0	0
652	1	48	1	26.9	1178.5	0	0	0	1	1	0	0	0	0	1	0	0
653	0	49	1	26.9	1376	0	1	1	1	0	0	0	0	0	0	0	0
654	1	45	1	26.9	1140.5	0	0	0	1	1	0	0	0	0	0	0	0
655	0	46	1	26.9	1111.5	0	0	1	1	0	0	0	0	0	0	0	0
656	1	51	1	26.9	1318	0	0	0	1	0	0	0	0	0	0	0	0
657	1	43	1	26.9	1359	0	1	1	1	1	0	1	0	0	0	0	0
658	1	39	1	26.9	1261	0	1	1	1	1	0	0	0	0	0	0	0
659	0	41	1	26.9	1241.5	0	0	0	1	0	0	0	0	0	0	0	0
660	1	34	1	26.9	1108.5	0	0	0	1	0	0	0	0	0	1	0	0
661	1	31	1	26.9	1202.5	0	0	0	1	1	0	0	0	0	0	0	0
662	0	79	1	26.8	1895.5	3	1	1	1	1	0	1	1	1	0	0	0
663	1	76	1	26.8	2040.5	3	1	1	1	1	0	1	1	0	0	0	0
664	1	74	1	26.8	1994.5	3	1	1	1	0	0	0	0	1	0	0	0
665	1	74	1	26.8	2276	3	1	1	1	0	1	0	0	0	0	0	0
666	0	61	1	26.8	1933.5	3	1	1	1	1	0	0	0	1	0	0	0
667	1	47	1	26.8	1926	3	1	1	1	1	0	0	0	1	0	0	0
668	0	54	1	26.8	2078	3	0	0	1	1	0	0	0	1	0	0	0
669	1	51	1	26.8	1701	2	0	0	1	1	0	0	0	0	0	0	0
670	1	57	1	26.8	1486	1	1	1	1	1	0	0	0	0	0	0	0
671	1	62	1	26.8	1566	1	1	1	1	0	0	0	0	0	0	0	0
672	0	56	1	26.8	1432	1	0	0	1	0	0	0	0	0	0	0	0
673	1	45	1	26.8	1498	1	1	1	1	1	0	0	0	1	1	0	0
674	1	48	1	26.8	1451	1	1	1	1	1	0	0	0	0	1	0	0
675	1	54	1	26.8	1481	1	0	0	1	0	0	0	0	0	1	0	0
676	1	44	1	26.8	1592	1	0	0	1	1	0	0	0	1	1	0	0
677	1	44	1	26.8	1550	1	0	0	1	0	0	0	0	0	0	0	0
678	1	50	1	26.8	1165	0	0	0	1	1	1	0	0	0	0	0	1
679	1	57	1	26.8	1184	0	0	1	1	1	0	1	0	0	0	1	0
680	1	58	1	26.8	1380.5	0	1	0	1	1	0	0	0	0	0	0	0
681	1	48	1	26.8	1271.5	0	0	1	1	1	0	0	0	0	1	1	0
682	1	46	1	26.8	1356.5	0	1	1	0	1	0	0	0	0	0	0	0
683	0	52	1	26.8	1307.5	0	1	1	1	0	0	0	0	0	0	0	0
684	1	43	1	26.8	1300	0	1	1	1	1	1	0	0	0	0	1	0
685	1	44	1	26.8	1394	0	1	0	1	1	0	0	0	0	1	1	0
686	1	41	1	26.8	1055.5	0	0	1	1	1	0	0	0	0	0	0	0
687	1	24	1	26.8	1396.5	0	1	1	1	1	0	0	0	0	0	0	0
688	1	31	1	26.8	1370.5	0	1	1	1	0	0	0	0	0	0	0	0
689	0	65	1	26.7	2616	3	1	1	1	0	0	1	1	1	0	0	0
690	1	56	1	26.7	1589	1	0	1	1	0	0	0	0	1	0	0	0
691	1	48	1	26.7	1468	1	1	0	1	1	0	0	0	0	0	0	0
692	1	48	1	26.7	1467	1	0	0	1	1	0	0	0	0	0	0	0
693	0	47	1	26.7	1472.5	1	0	0	1	1	0	0	0	0	0	0	0
694	1	44	1	26.7	1409	1	1	1	1	1	0	0	0	0	0	0	0
695	1	41	1	26.7	1435.5	1	0	0	0	1	0	1	0	0	0	0	0
696	1	48	1	26.7	1199.5	0	0	0	1	1	0	0	0	0	0	1	1
697	1	59	1	26.7	1356.5	0	0	1	1	0	0	0	0	1	0	0	0
698	1	46	1	26.7	1272.5	0	1	1	1	0	0	0	0	1	1	0	0
699	1	48	1	26.7	1196.5	0	1	1	1	1	0	0	0	0	0	0	0
700	1	51	1	26.7	1394.5	0	0	0	1	1	0	0	0	0	0	1	0
701	0	48	1	26.7	1369.5	0	0	0	0	1	0	0	0	0	0	0	0
702	1	42	1	26.7	1306	0	1	1	1	0	0	0	0	0	1	1	0
703	1	35	1	26.7	1230	0	1	1	1	0	1	0	0	0	0	1	0
704	1	40	1	26.7	1281	0	1	1	1	1	0	0	0	0	0	0	0
705	1	44	1	26.7	1335.5	0	1	1	1	1	0	0	0	0	0	0	0
706	1	36	1	26.7	1341.5	0	1	1	1	1	0	0	0	0	0	0	0
707	1	29	1	26.7	1321	0	0	0	1	0	1	0	0	0	0	0	0
708	1	73	1	26.6	2150.5	3	0	0	1	0	0	1	1	1	0	0	0
709	1	70	1	26.6	1979	3	0	0	1	0	1	0	0	0	0	0	0
710	1	57	1	26.6	2032	3	1	1	1	0	0	1	0	1	1	0	0
711	1	37	1	26.6	1720.5	2	1	1	1	1	0	0	0	0	0	1	0
712	1	44	1	26.6	1791.5	2	1	1	1	0	0	0	0	0	0	0	0
713	1	63	1	26.6	1434.5	1	1	1	1	0	0	0	0	1	1	1	1
714	0	56	1	26.6	1424	1	1	1	1	1	0	0	0	0	0	0	0
715	0	57	1	26.6	1464	1	0	0	1	0	0	0	0	0	0	0	0
716	1	49	1	26.6	1433.5	1	0	1	1	1	0	1	0	0	0	0	0
717	1	54	1	26.6	1501	1	1	0	0	1	0	0	0	0	0	1	0
718	1	43	1	26.6	1477.5	1	1	1	1	1	0	0	0	0	0	0	0
719	1	42	1	26.6	1546.5	1	0	0	1	1	1	0	0	0	0	0	0
720	1	41	1	26.6	1428.5	1	0	0	1	0	0	0	0	0	1	0	0
721	1	40	1	26.6	1407.5	1	0	0	1	1	0	0	0	0	0	0	0
722	1	48	1	26.6	1215	0	0	0	0	1	1	0	0	0	1	1	0
723	1	52	1	26.6	1232	0	0	0	1	1	0	1	0	0	0	1	0
724	1	51	1	26.6	1344.5	0	1	0	1	1	0	0	0	0	0	1	0
725	0	50	1	26.6	1351.5	0	0	0	1	1	0	0	0	0	0	0	0
726	1	48	1	26.6	1320	0	0	0	1	0	0	0	0	0	0	0	0
727	1	41	1	26.6	1278.5	0	1	1	1	1	0	0	0	0	1	1	0
728	1	40	1	26.6	1171	0	0	0	1	1	0	0	0	0	0	1	0
729	0	44	1	26.6	1316.5	0	1	0	1	1	0	0	0	0	0	0	0
730	1	43	1	26.6	1253.5	0	0	0	1	0	0	0	0	0	1	0	0
731	1	41	1	26.6	1228.5	0	0	0	1	1	0	0	0	0	0	0	0
732	0	65	1	26.5	2400.5	3	1	0	1	1	0	0	0	1	0	0	0
733	1	56	1	26.5	1895.5	3	1	0	1	1	0	0	0	1	1	0	0
734	1	60	1	26.5	2197	3	1	0	1	1	0	0	0	0	0	0	0
735	1	72	1	26.5	1578.5	1	0	0	0	0	0	1	0	0	0	0	0
736	1	47	1	26.5	1462	1	1	1	1	1	0	0	0	0	1	1	0
737	1	51	1	26.5	1426.5	1	1	1	1	1	0	0	0	0	1	0	0
738	0	51	1	26.5	1577.5	1	0	1	1	1	0	1	0	0	0	0	0
739	0	46	1	26.5	1435.5	1	1	0	1	0	0	0	0	0	0	0	0
740	1	37	1	26.5	1592.5	1	0	0	1	0	0	0	0	0	0	0	0
741	1	50	1	26.5	1189	0	0	0	1	0	0	0	0	0	0	0	1
742	1	60	1	26.5	1340.5	0	1	1	1	0	0	0	0	0	0	0	0
743	1	50	1	26.5	1368	0	1	1	1	1	1	0	0	0	0	0	0
744	0	50	1	26.5	1303.5	0	1	1	1	0	0	0	0	0	0	0	0
745	1	47	1	26.5	1310.5	0	0	0	1	1	0	0	0	0	0	0	0
746	1	51	1	26.5	1280	0	0	1	1	0	0	0	0	0	0	0	0
747	1	50	1	26.5	1389.5	0	0	0	1	0	0	0	0	0	0	0	0
748	1	46	1	26.5	1117.5	0	0	0	0	0	0	0	0	0	0	0	0
749	1	41	1	26.5	1368	0	0	0	1	1	1	0	0	1	0	0	0
750	1	38	1	26.5	1340.5	0	0	1	1	0	1	0	0	0	0	0	0
751	0	43	1	26.5	1229.5	0	0	0	1	1	0	0	0	0	0	0	0
752	1	44	1	26.5	1276.5	0	0	0	1	1	0	0	0	0	0	0	0
753	1	44	1	26.5	1280.5	0	0	0	0	1	0	0	0	0	0	0	0
754	1	36	1	26.5	1328.5	0	0	0	1	0	0	0	0	0	0	0	0
755	1	34	1	26.5	1126.5	0	0	0	1	1	0	0	0	0	0	0	0
756	1	28	1	26.5	1101	0	0	0	1	0	0	0	0	0	0	0	0
757	0	65	1	26.4	1960.5	3	1	1	1	0	0	0	0	1	0	0	1
758	0	68	1	26.4	2260	3	1	0	1	0	0	0	0	1	0	0	0
759	1	75	1	26.4	2057	3	0	0	1	0	0	0	0	1	0	0	0
760	0	68	1	26.4	2260	3	1	0	1	0	0	0	0	0	0	0	0
761	1	81	1	26.4	2374	3	0	0	1	0	0	0	0	0	0	0	0
762	0	57	1	26.4	1951.5	3	0	1	1	0	0	0	0	0	0	0	0
763	1	61	1	26.4	1612	2	1	1	1	0	0	0	0	0	0	0	1
764	0	56	1	26.4	1794	2	1	1	1	1	0	1	1	1	0	0	0
765	1	61	1	26.4	1612.5	2	0	0	1	1	0	1	0	1	0	0	0
766	1	50	1	26.4	1690	2	1	1	1	1	0	0	1	1	0	1	0
767	1	46	1	26.4	1777.5	2	1	1	1	0	0	1	1	1	0	0	0
768	1	48	1	26.4	1718.5	2	1	1	1	1	0	1	0	1	0	0	0
769	1	42	1	26.4	1639.5	2	0	0	1	1	0	0	0	0	0	0	0
770	0	41	1	26.4	1760	2	0	0	1	1	0	0	0	0	0	0	0
771	0	59	1	26.4	1410.5	1	1	1	1	0	0	0	0	0	0	0	0
772	1	48	1	26.4	1475.5	1	0	0	1	1	0	0	0	0	1	1	0
773	1	50	1	26.4	1599.5	1	0	0	0	1	0	1	1	1	0	0	0
774	1	51	1	26.4	1546.5	1	1	0	1	1	0	0	0	1	0	0	0
775	1	46	1	26.4	1488	1	1	1	1	0	0	0	0	1	0	0	0
776	1	50	1	26.4	1576.5	1	1	1	1	0	0	0	0	0	0	0	0
777	1	38	1	26.4	1481.5	1	0	0	1	1	1	0	0	0	1	1	0
778	1	31	1	26.4	1475.5	1	0	0	1	1	0	0	0	0	0	0	0
779	1	55	1	26.4	1313.5	0	1	1	1	0	0	0	0	0	1	1	1
780	1	75	1	26.4	1344	0	0	0	0	0	0	0	0	0	0	0	0
781	1	59	1	26.4	1303.5	0	1	1	1	1	0	0	0	0	0	1	0
782	1	53	1	26.4	1389	0	1	1	1	0	0	0	0	0	0	1	0
783	1	48	1	26.4	1372	0	1	1	1	0	0	0	0	0	0	0	0
784	1	49	1	26.4	1308.5	0	0	0	1	1	0	0	0	0	0	0	0
785	1	47	1	26.4	1156	0	0	0	0	1	0	0	0	0	0	0	0
786	0	51	1	26.4	1065.5	0	0	0	1	0	0	0	0	0	0	0	0
787	1	46	1	26.4	1285	0	0	0	1	0	0	0	0	0	0	0	0
788	1	43	1	26.4	1077	0	1	1	1	1	0	0	0	0	0	1	0
789	1	39	1	26.4	1305	0	1	1	1	1	0	0	0	0	0	0	0
790	1	41	1	26.4	1251.5	0	0	0	1	1	0	0	0	0	0	1	0
791	1	42	1	26.4	1291.5	0	1	0	0	1	0	0	0	0	0	1	0
792	1	36	1	26.4	1280.5	0	0	0	1	1	0	0	0	0	0	0	0
793	0	36	1	26.4	1329	0	0	0	1	0	0	0	0	0	0	0	0
794	0	72	1	26.3	1956.5	3	1	1	1	1	0	0	0	1	0	0	0
795	0	67	1	26.3	2330	3	1	1	1	1	0	0	0	1	0	0	0
796	1	82	1	26.3	2791.5	3	1	0	0	0	1	0	0	1	0	0	0
797	0	78	1	26.3	1907.5	3	0	0	1	0	0	0	0	0	0	0	0
798	1	75	1	26.3	1993	3	0	0	1	0	0	0	0	0	0	0	0
799	0	62	1	26.3	2532.5	3	1	1	1	1	0	0	0	1	0	0	0
800	1	53	1	26.3	1958.5	3	0	0	1	0	0	0	0	1	0	1	0
801	1	38	1	26.3	1806	3	0	0	1	1	0	0	0	0	0	0	0
802	1	57	1	26.3	1690.5	2	0	0	1	1	0	0	0	1	1	0	0
803	0	51	1	26.3	1642	2	0	0	1	0	0	0	0	0	0	0	0
804	1	42	1	26.3	1721.5	2	1	1	1	1	0	0	0	0	0	1	0
805	1	44	1	26.3	1709.5	2	1	0	1	1	1	1	0	0	0	0	0
806	1	38	1	26.3	1666	2	0	0	1	1	0	0	0	0	0	0	0
807	0	72	1	26.3	1570.5	1	1	0	1	0	0	0	1	1	0	0	0
808	1	59	1	26.3	1428	1	0	0	1	1	0	0	0	1	0	1	0
809	1	57	1	26.3	1513.5	1	1	0	1	0	0	0	0	0	0	1	0
810	0	50	1	26.3	1452.5	1	1	1	1	0	0	0	0	0	0	0	0
811	1	44	1	26.3	1424	1	1	1	1	1	0	0	0	0	1	0	0
812	1	49	1	26.3	1275	0	1	1	1	1	0	0	0	0	1	0	1
813	1	48	1	26.3	1331	0	0	1	1	1	0	0	0	0	0	0	1
814	1	51	1	26.3	1336.5	0	0	0	1	0	0	0	0	0	1	0	1
815	1	57	1	26.3	1152	0	0	0	1	1	1	0	0	0	0	0	0
816	1	57	1	26.3	1322.5	0	1	1	1	0	0	0	0	0	0	0	0
817	1	51	1	26.3	1128.5	0	1	1	1	1	0	0	0	1	0	0	0
818	1	49	1	26.3	1336.5	0	0	1	1	1	0	1	1	0	0	0	0
819	1	46	1	26.3	1266.5	0	1	1	1	1	0	0	0	0	0	0	0
820	1	49	1	26.3	1331	0	1	1	1	1	0	0	0	0	0	0	0
821	1	51	1	26.3	1254.5	0	0	1	1	0	0	0	0	1	0	0	0
822	1	47	1	26.3	1333	0	0	0	1	1	0	0	0	0	0	0	0
823	1	49	1	26.3	1339.5	0	0	0	1	1	0	0	0	0	0	0	0
824	1	46	1	26.3	1131	0	0	0	1	0	0	0	0	0	0	0	0
825	0	49	1	26.3	1155.5	0	0	0	1	0	0	0	0	0	0	0	0
826	1	44	1	26.3	1310.5	0	1	1	1	1	0	0	0	0	0	0	0
827	1	41	1	26.3	1399.5	0	1	1	1	1	0	0	0	0	0	0	0
828	1	41	1	26.3	1394.5	0	0	0	1	1	0	0	0	1	0	0	0
829	0	38	1	26.3	1215.5	0	1	1	1	0	0	0	0	0	0	0	0
830	1	44	1	26.3	1363.5	0	0	0	1	1	0	0	0	0	0	0	0
831	1	42	1	26.3	1216.5	0	0	0	1	0	0	0	0	0	0	0	0
832	1	34	1	26.3	1331	0	0	1	1	1	0	0	0	0	0	0	0
833	0	31	1	26.3	1207.5	0	0	0	1	1	0	0	0	0	0	0	0
834	1	75	1	26.2	1887.5	3	0	0	1	1	0	0	1	1	0	0	0
835	1	58	1	26.2	2002.5	3	1	1	1	1	0	0	0	1	0	0	0
836	1	58	1	26.2	1623	2	1	1	1	0	0	0	0	1	0	1	0
837	1	63	1	26.2	1672.5	2	1	1	1	0	0	1	0	0	0	0	0
838	1	64	1	26.2	1643.5	2	0	0	1	0	0	0	0	1	0	0	0
839	1	56	1	26.2	1620.5	2	0	0	1	0	0	0	0	0	0	0	0
840	1	49	1	26.2	1726.5	2	1	1	1	1	0	1	0	1	0	0	0
841	1	51	1	26.2	1694	2	0	0	1	0	0	0	0	1	0	0	0
842	1	33	1	26.2	1488	1	0	0	0	1	0	0	0	0	1	0	1
843	1	55	1	26.2	1409	1	1	1	1	0	0	0	0	0	0	1	0
844	1	45	1	26.2	1592	1	1	1	1	1	0	1	0	0	0	0	0
845	0	53	1	26.2	1565.5	1	1	1	1	0	0	0	0	0	0	0	0
846	1	53	1	26.2	1427	1	0	0	1	1	0	0	0	0	0	0	0
847	1	45	1	26.2	1593	1	0	0	1	0	0	0	0	0	0	0	0
848	1	36	1	26.2	1494	1	1	1	1	1	0	0	0	0	0	0	0
849	1	47	1	26.2	1325	0	0	0	1	1	0	0	0	0	1	0	1
850	1	50	1	26.2	1333	0	0	0	1	1	0	0	0	0	0	1	0
851	1	53	1	26.2	1145	0	1	1	1	0	0	0	0	0	0	0	0
852	1	49	1	26.2	1257	0	1	1	1	0	0	0	0	0	0	0	0
853	1	52	1	26.2	1360.5	0	0	0	1	1	0	0	0	0	0	0	0
854	1	35	1	26.2	1186	0	1	1	1	0	1	0	0	0	0	0	0
855	0	41	1	26.2	1156.5	0	1	1	1	1	0	0	0	0	0	0	0
856	1	41	1	26.2	1156.5	0	1	1	1	1	0	0	0	0	0	0	0
857	0	39	1	26.2	1331.5	0	1	1	1	1	0	0	0	0	0	0	0
858	1	40	1	26.2	1205.5	0	0	0	1	0	0	0	0	0	0	0	0
859	1	34	1	26.2	1229.5	0	0	0	1	1	0	1	0	0	1	1	0
860	0	76	1	26.1	3027	3	1	0	1	1	0	0	0	1	0	0	0
861	1	65	1	26.1	1854	3	0	0	1	1	0	0	0	1	0	0	0
862	1	46	1	26.1	1904	3	1	1	1	1	1	0	0	1	0	0	0
863	1	57	1	26.1	1697	2	0	0	1	0	0	1	0	1	0	0	0
864	1	49	1	26.1	1631	2	1	1	1	0	1	0	0	0	0	0	0
865	1	45	1	26.1	1603.5	2	1	1	1	1	0	0	0	0	0	0	0
866	0	71	1	26.1	1558.5	1	0	0	1	0	0	0	0	0	0	0	0
867	1	58	1	26.1	1513	1	1	1	1	1	0	0	0	0	0	0	0
868	1	60	1	26.1	1546.5	1	1	1	1	0	0	0	0	0	0	0	0
869	0	63	1	26.1	1530.5	1	0	0	1	1	0	0	0	0	0	0	0
870	1	51	1	26.1	1594	1	1	1	1	1	0	0	0	1	1	0	0
871	1	48	1	26.1	1405	1	0	0	1	1	1	0	0	0	0	1	0
872	1	48	1	26.1	1465	1	1	1	1	0	0	0	0	0	0	1	0
873	1	47	1	26.1	1423	1	0	0	1	1	1	0	0	1	0	0	0
874	0	44	1	26.1	1482	1	0	0	1	1	0	0	0	1	0	0	0
875	1	42	1	26.1	1482	1	1	0	1	1	0	0	0	0	0	0	0
876	1	43	1	26.1	1428	1	0	0	1	0	0	0	0	0	0	0	0
877	1	35	1	26.1	1429.5	1	0	0	1	0	0	0	0	0	0	0	0
878	1	35	1	26.1	1429.5	1	0	0	1	0	0	0	0	0	0	0	0
879	1	35	1	26.1	1470	1	0	0	1	0	0	0	0	0	0	0	0
880	1	58	1	26.1	1281	0	0	0	0	1	0	0	0	0	0	1	0
881	0	59	1	26.1	1235	0	0	0	1	1	0	0	0	0	0	0	0
882	0	46	1	26.1	1219.5	0	1	1	1	1	0	0	0	0	0	0	0
883	1	49	1	26.1	1353	0	0	0	1	1	1	0	0	0	0	0	0
884	1	48	1	26.1	1371	0	0	0	1	0	0	1	0	0	0	0	0
885	0	48	1	26.1	1145	0	0	0	1	1	0	0	0	0	0	0	0
886	1	54	1	26.1	1358	0	0	0	1	0	0	0	0	0	0	0	0
887	1	44	1	26.1	1293	0	0	0	1	1	0	0	0	1	1	0	0
888	1	40	1	26.1	1353	0	1	1	1	1	0	0	0	0	0	0	0
889	1	36	1	26.1	1181.5	0	0	0	0	0	0	0	0	0	0	0	0
890	1	74	1	26	2412	3	0	0	1	1	0	1	0	1	0	0	0
891	1	68	1	26	2202	3	0	1	1	0	0	0	0	1	0	0	0
892	1	73	1	26	2441	3	0	0	1	1	0	0	0	1	0	0	0
893	1	66	1	26	1875.5	3	0	1	1	0	0	0	0	1	0	0	0
894	0	81	1	26	2063.5	3	1	0	1	1	0	0	0	0	0	0	0
895	1	68	1	26	2023	3	0	0	1	0	0	0	0	1	0	0	0
896	0	77	1	26	2181.5	3	0	0	1	0	0	0	0	1	0	0	0
897	1	52	1	26	1922	3	0	1	1	1	0	0	0	0	0	1	0
898	1	50	1	26	1834.5	3	0	0	1	1	0	0	0	0	0	0	0
899	1	65	1	26	1722.5	2	1	1	1	0	0	0	0	1	0	0	0
900	0	57	1	26	1639.5	2	1	1	1	0	0	1	0	1	0	0	0
901	1	51	1	26	1732	2	1	1	1	1	1	0	0	0	0	0	0
902	0	48	1	26	1652.5	2	0	0	1	0	0	0	0	0	0	0	0
903	1	42	1	26	1652	2	0	0	1	1	0	0	0	0	0	0	0
904	0	56	1	26	1404	1	0	0	1	0	0	0	0	0	0	0	1
905	0	51	1	26	1494	1	0	1	1	0	0	0	0	1	0	0	1
906	1	59	1	26	1595	1	0	1	1	0	0	0	0	0	1	0	0
907	1	55	1	26	1457	1	0	1	1	0	0	0	0	0	0	0	0
908	1	50	1	26	1447.5	1	1	1	1	1	0	0	0	0	1	1	0
909	1	48	1	26	1589.5	1	0	0	1	1	1	0	0	1	1	0	0
910	1	49	1	26	1402	1	1	1	1	1	0	0	0	0	0	0	0
911	1	47	1	26	1480	1	0	0	1	1	0	0	0	0	0	0	0
912	1	42	1	26	1516.5	1	1	0	1	1	1	0	0	0	0	0	0
913	1	41	1	26	1102	0	1	1	1	0	0	0	0	0	0	0	1
914	1	55	1	26	1313.5	0	1	1	1	1	0	0	0	0	1	1	0
915	0	61	1	26	1346.5	0	1	1	1	1	0	0	0	1	0	0	0
916	1	55	1	26	1272	0	0	0	1	0	0	0	0	0	0	0	0
917	0	57	1	26	1358.5	0	0	0	1	0	0	0	0	0	0	0	0
918	1	57	1	26	1396	0	0	0	1	0	0	0	0	0	0	0	0
919	1	51	1	26	1362.5	0	1	1	1	1	1	0	0	0	0	0	0
920	1	50	1	26	1367	0	0	0	1	0	0	0	0	1	0	0	0
921	1	48	1	26	1101.5	0	0	0	1	1	0	0	0	0	0	0	0
922	0	49	1	26	1219	0	0	0	1	0	0	0	0	0	0	0	0
923	1	51	1	26	1283.5	0	0	0	1	0	0	0	0	0	0	0	0
924	1	44	1	26	1340	0	1	1	1	0	0	0	0	1	1	1	0
925	1	35	1	26	1292.5	0	1	1	1	1	0	0	0	0	0	1	0
926	1	38	1	26	1399	0	1	1	1	1	1	0	0	0	0	0	0
927	1	38	1	26	1399	0	1	1	1	1	1	0	0	0	0	0	0
928	1	41	1	26	1220	0	0	0	1	1	0	0	0	0	1	0	0
929	1	37	1	26	1399.5	0	1	1	1	0	0	0	0	0	0	0	0
930	1	35	1	26	1377.5	0	0	0	1	1	0	0	0	0	0	0	0
931	1	33	1	26	1217.5	0	1	1	1	1	1	0	0	0	0	1	0
932	1	32	1	26	1241.5	0	1	0	1	1	1	0	0	0	0	0	0
933	1	29	1	26	1259	0	0	0	1	0	1	0	0	0	0	0	0
934	1	33	1	26	1223	0	0	0	1	1	0	0	0	0	0	0	0
935	1	34	1	26	1291.5	0	0	0	1	1	0	0	0	0	0	0	0
936	1	57	1	25.9	1893.5	3	1	0	1	1	1	0	0	1	0	0	1
937	0	61	1	25.9	1920	3	1	1	1	1	0	0	0	0	0	0	0
938	1	41	1	25.9	1913.5	3	1	1	1	0	0	0	0	0	0	0	0
939	1	73	1	25.9	1789	2	0	0	1	0	0	0	0	0	0	0	0
940	1	50	1	25.9	1793	2	1	1	1	1	0	0	0	1	0	0	0
941	1	61	1	25.9	1498	1	1	1	1	0	0	0	0	1	0	0	0
942	1	55	1	25.9	1536.5	1	0	0	1	0	0	0	0	0	0	0	0
943	1	50	1	25.9	1402	1	1	1	1	1	0	1	0	0	0	0	0
944	1	50	1	25.9	1558.5	1	0	0	1	1	0	1	0	0	0	0	0
945	1	52	1	25.9	1442.5	1	0	0	1	0	0	0	0	1	0	0	0
946	1	42	1	25.9	1478.5	1	0	0	1	1	1	0	0	0	0	0	0
947	1	39	1	25.9	1558	1	0	0	1	1	0	0	0	0	0	0	0
948	1	31	1	25.9	1469.5	1	1	1	1	1	1	0	0	0	1	0	0
949	1	53	1	25.9	1344.5	0	1	1	1	0	0	0	0	0	0	1	0
950	1	53	1	25.9	1279.5	0	1	0	1	0	1	0	0	0	0	0	0
951	0	50	1	25.9	1208.5	0	0	0	1	0	0	0	0	0	0	0	0
952	1	41	1	25.9	1287.5	0	1	1	1	1	0	1	0	0	0	1	0
953	1	38	1	25.9	1156	0	0	0	1	1	0	0	0	0	0	0	0
954	1	25	1	25.9	1210	0	0	0	1	1	0	0	0	0	0	0	0
955	0	56	1	25.8	2167	3	1	1	1	0	0	1	1	1	0	0	0
956	0	62	1	25.8	2115	3	1	1	1	1	0	0	0	0	0	0	0
957	1	55	1	25.8	1900	3	0	0	1	1	0	0	0	0	0	0	0
958	1	54	1	25.8	2407	3	0	0	1	1	0	0	0	1	0	0	0
959	1	65	1	25.8	1773.5	2	0	0	1	0	0	0	0	0	0	1	0
960	1	61	1	25.8	1657.5	2	0	1	1	1	1	1	0	0	0	0	0
961	1	57	1	25.8	1749.5	2	0	0	1	1	0	0	0	1	0	1	0
962	1	64	1	25.8	1747.5	2	0	0	1	1	0	0	0	0	0	0	0
963	0	50	1	25.8	1632	2	0	0	1	1	0	1	0	0	0	0	0
964	1	69	1	25.8	1461	1	1	1	1	1	1	0	0	0	0	0	0
965	1	60	1	25.8	1533	1	0	0	1	1	0	0	0	1	0	0	0
966	1	46	1	25.8	1578	1	1	1	1	1	0	0	0	1	0	0	0
967	1	45	1	25.8	1587	1	0	1	1	1	0	0	0	1	0	0	0
968	1	51	1	25.8	1549.5	1	1	0	1	1	0	0	0	1	0	0	0
969	1	51	1	25.8	1478	1	0	0	1	1	0	0	0	1	0	0	0
970	1	51	1	25.8	1403.5	1	0	0	1	0	0	0	0	0	0	0	0
971	1	33	1	25.8	1463	1	1	0	1	1	1	0	0	0	1	0	0
972	1	55	1	25.8	1283.5	0	0	0	1	1	0	0	0	0	0	1	1
973	0	56	1	25.8	1218.5	0	1	1	1	0	0	0	0	0	0	0	1
974	1	44	1	25.8	1198	0	1	1	0	1	0	0	0	0	1	1	1
975	0	55	1	25.8	1307	0	1	1	1	1	0	0	0	0	0	0	0
976	1	58	1	25.8	1242	0	0	0	1	0	1	0	0	0	1	0	0
977	1	55	1	25.8	1282	0	0	0	1	0	0	0	0	1	0	0	0
978	0	50	1	25.8	925.5	0	1	1	1	1	0	0	0	0	1	0	0
979	1	51	1	25.8	1281.5	0	1	1	1	1	1	0	0	0	0	0	0
980	1	48	1	25.8	1291	0	1	1	1	0	0	0	0	0	0	1	0
981	1	50	1	25.8	1265	0	0	0	1	1	1	0	0	0	1	0	0
982	0	49	1	25.8	1290	0	1	1	1	0	0	1	0	0	0	0	0
983	1	51	1	25.8	1344.5	0	0	0	1	1	0	0	0	0	0	0	0
984	1	36	1	25.8	1139	0	1	1	1	1	0	0	0	0	0	1	0
985	1	38	1	25.8	1308.5	0	1	1	1	1	1	0	0	0	0	0	0
986	0	44	1	25.8	1287.5	0	1	1	1	1	0	0	0	0	0	0	0
987	1	41	1	25.8	1340	0	1	1	1	1	0	0	0	0	0	0	0
988	1	39	1	25.8	1074	0	0	0	1	1	0	0	0	0	0	0	0
989	1	41	1	25.8	1253	0	0	0	1	1	0	0	0	0	0	0	0
990	0	38	1	25.8	1346	0	0	0	1	0	0	0	0	0	0	0	0
991	1	38	1	25.8	1123	0	0	0	1	0	0	0	0	0	0	0	0
992	1	24	1	25.8	1257	0	0	0	1	0	1	0	0	0	0	0	0
993	1	67	1	25.7	1974	3	1	1	1	0	0	1	1	1	0	0	0
994	1	69	1	25.7	1930.5	3	1	1	1	0	0	0	0	1	0	0	0
995	1	73	1	25.7	1905	3	0	0	1	0	0	0	0	0	0	0	0
996	1	56	1	25.7	3434	3	0	0	1	0	0	0	0	1	0	0	0
997	0	60	1	25.7	1721	2	1	1	1	0	0	0	0	0	0	0	0
998	1	30	1	25.7	1612.5	2	0	0	1	1	1	0	0	0	0	0	0
999	1	77	1	25.7	1462	1	0	1	1	0	0	0	0	1	0	0	0
1000	1	55	1	25.7	1565	1	0	0	1	1	1	1	1	1	0	0	0
1001	1	57	1	25.7	1568	1	1	0	0	1	1	0	0	0	0	0	0
1002	0	63	1	25.7	1430	1	0	1	1	1	0	0	0	0	0	0	0
1003	1	54	1	25.7	1599.5	1	0	0	1	1	0	0	0	0	0	0	0
1004	1	53	1	25.7	1467.5	1	0	0	1	0	0	0	0	0	0	0	0
1005	1	41	1	25.7	1586	1	0	0	1	1	0	1	0	1	0	0	0
1006	1	55	1	25.7	1330	0	0	0	1	1	1	0	0	0	0	1	0
1007	1	60	1	25.7	1254	0	0	1	0	1	0	0	0	1	0	0	0
1008	0	56	1	25.7	1232.5	0	0	0	1	0	0	0	0	1	0	0	0
1009	1	46	1	25.7	1242	0	0	0	1	0	1	0	0	0	0	0	0
1010	1	49	1	25.7	1179.5	0	0	0	1	0	0	0	0	0	0	0	0
1011	1	43	1	25.7	1332	0	0	1	1	0	0	0	0	0	0	1	0
1012	1	44	1	25.7	1326.5	0	0	1	1	1	0	0	0	0	0	0	0
1013	1	42	1	25.7	1131	0	0	0	1	1	0	0	0	0	0	0	0
1014	1	36	1	25.7	1122.5	0	0	0	1	0	0	0	0	0	0	0	0
1015	1	24	1	25.7	1293.5	0	0	1	1	0	1	0	0	0	0	0	0
1016	0	72	1	25.6	2220.5	3	1	1	1	1	0	0	0	1	0	0	0
1017	1	57	1	25.6	2040.5	3	1	1	1	1	0	0	0	1	0	0	0
1018	1	58	1	25.6	1694	2	1	1	1	0	0	0	0	0	0	1	0
1019	0	60	1	25.6	1792	2	1	0	1	0	0	0	0	1	0	0	0
1020	1	51	1	25.6	1649.5	2	0	1	1	0	0	1	0	1	1	1	0
1021	0	66	1	25.6	1494	1	1	1	1	0	0	0	0	0	0	0	1
1022	0	71	1	25.6	1459	1	0	0	1	0	0	0	0	1	0	0	0
1023	0	57	1	25.6	1505	1	1	1	1	1	0	1	1	0	0	0	0
1024	0	63	1	25.6	1534	1	1	1	1	0	0	0	0	0	0	0	0
1025	1	56	1	25.6	1581	1	0	0	1	1	0	0	0	0	0	0	0
1026	1	49	1	25.6	1416.5	1	1	1	1	1	1	0	0	0	0	0	0
1027	1	45	1	25.6	1587	1	1	1	1	1	1	0	0	0	0	0	0
1028	0	54	1	25.6	1500.5	1	1	1	1	0	0	0	0	0	0	0	0
1029	1	43	1	25.6	1493	1	1	1	1	1	0	0	0	0	0	0	0
1030	1	38	1	25.6	1535.5	1	1	1	1	1	0	0	0	0	0	0	0
1031	1	57	1	25.6	1309	0	0	0	0	1	0	0	0	0	0	0	0
1032	1	48	1	25.6	1308.5	0	0	0	1	1	0	0	0	0	0	1	0
1033	1	48	1	25.6	1379	0	1	0	0	1	1	0	0	0	0	0	0
1034	1	50	1	25.6	1109.5	0	0	0	1	0	0	0	0	0	0	1	0
1035	1	50	1	25.6	1388	0	0	0	1	0	0	0	0	0	0	1	0
1036	1	50	1	25.6	1388	0	0	0	1	0	0	0	0	0	0	1	0
1037	1	47	1	25.6	1233.5	0	0	0	1	1	0	0	0	0	0	0	0
1038	1	48	1	25.6	1395	0	0	0	1	1	0	0	0	0	0	0	0
1039	1	43	1	25.6	1189.5	0	1	1	1	1	0	0	0	0	0	1	0
1040	1	43	1	25.6	1279.5	0	0	0	1	1	0	0	0	0	1	0	0
1041	1	44	1	25.6	1394	0	1	0	1	1	0	0	0	0	0	0	0
1042	1	44	1	25.6	1117.5	0	0	0	1	1	0	0	0	0	0	0	0
1043	0	41	1	25.6	1161	0	0	0	1	1	0	0	0	0	0	0	0
1044	1	32	1	25.6	1238	0	1	0	1	1	0	0	0	0	0	0	0
1045	1	30	1	25.6	1393.5	0	0	0	1	1	0	0	0	0	0	0	0
1046	1	28	1	25.6	1281	0	0	0	1	0	0	0	0	0	0	0	0
1047	1	60	1	25.5	2111.5	3	0	0	1	1	1	0	0	1	1	0	0
1048	1	61	1	25.5	1674.5	2	1	0	1	1	0	1	1	1	0	0	0
1049	1	56	1	25.5	1739	2	1	0	1	1	0	0	0	1	0	0	0
1050	1	59	1	25.5	1763	2	0	0	1	1	0	0	0	0	0	0	0
1051	1	43	1	25.5	1659.5	2	1	0	1	1	1	0	0	0	0	0	0
1052	1	66	1	25.5	1590	1	0	0	0	1	0	1	0	1	0	0	0
1053	0	68	1	25.5	1569	1	0	1	1	1	0	0	0	0	0	0	0
1054	0	61	1	25.5	1524.5	1	1	1	1	0	0	0	0	0	0	0	0
1055	1	50	1	25.5	1493	1	0	0	0	1	0	1	1	0	0	0	0
1056	1	51	1	25.5	1500.5	1	0	0	1	0	0	0	0	0	0	0	0
1057	0	44	1	25.5	1548.5	1	1	1	1	1	0	0	0	0	0	0	0
1058	1	32	1	25.5	1582	1	1	1	1	0	0	0	0	0	0	0	0
1059	1	48	1	25.5	1293.5	0	1	1	1	0	0	1	0	0	0	0	1
1060	1	68	1	25.5	1175.5	0	0	0	1	0	0	0	0	1	0	0	0
1061	0	58	1	25.5	1297	0	1	0	1	1	0	0	0	0	0	0	0
1062	0	57	1	25.5	1290.5	0	1	1	1	0	0	0	0	0	0	0	0
1063	1	62	1	25.5	1243.5	0	0	0	1	0	0	0	0	0	0	0	0
1064	0	49	1	25.5	1356.5	0	1	1	1	0	0	1	0	0	0	0	0
1065	1	46	1	25.5	1397.5	0	1	1	1	0	0	0	0	0	0	0	0
1066	1	49	1	25.5	1267	0	1	0	1	0	0	0	0	0	0	0	0
1067	1	49	1	25.5	1367	0	0	0	1	0	0	0	0	0	0	0	0
1068	1	44	1	25.5	1392.5	0	1	1	1	1	0	0	0	1	0	0	0
1069	1	42	1	25.5	1132	0	0	1	1	1	0	0	0	0	0	0	0
1070	1	71	1	25.4	2264.5	3	0	0	1	0	0	0	0	0	0	0	1
1071	1	82	1	25.4	2416.5	3	0	0	1	1	1	0	0	0	0	0	0
1072	1	63	1	25.4	1674	2	0	0	1	0	0	0	0	1	0	0	0
1073	0	51	1	25.4	1773	2	0	0	0	1	0	1	0	1	0	0	0
1074	1	56	1	25.4	1401.5	1	0	0	1	1	0	0	0	1	0	0	0
1075	1	61	1	25.4	1494.5	1	0	1	1	0	0	0	0	1	0	0	0
1076	1	57	1	25.4	1491.5	1	0	0	1	0	0	1	1	0	0	0	0
1077	1	58	1	25.4	1484.5	1	1	0	1	1	0	0	0	0	0	0	0
1078	1	57	1	25.4	1414.5	1	0	0	1	0	0	0	0	0	0	0	0
1079	1	48	1	25.4	1578.5	1	0	1	1	0	0	1	0	0	0	0	0
1080	1	48	1	25.4	1578.5	1	0	1	1	0	0	1	0	0	0	0	0
1081	1	47	1	25.4	1407	1	1	1	1	0	0	0	0	0	0	0	0
1082	1	50	1	25.4	1435	1	0	0	1	0	0	0	0	1	0	0	0
1083	1	54	1	25.4	1422	1	0	0	1	1	0	0	0	0	0	0	0
1084	1	35	1	25.4	1425.5	1	1	0	1	1	1	0	0	0	1	1	0
1085	1	61	1	25.4	1278	0	1	1	1	1	0	0	0	0	1	0	0
1086	1	51	1	25.4	1323.5	0	1	1	1	0	0	0	0	0	1	0	0
1087	1	49	1	25.4	1359.5	0	0	0	1	1	0	0	0	0	0	1	0
1088	1	49	1	25.4	1206.5	0	1	1	1	0	0	0	0	0	0	0	0
1089	0	53	1	25.4	1085	0	0	0	1	1	0	0	0	0	0	0	0
1090	1	47	1	25.4	1365	0	0	0	1	0	0	0	0	0	0	0	0
1091	1	38	1	25.4	1180	0	1	1	1	1	1	0	0	0	0	0	0
1092	1	43	1	25.4	1078	0	0	0	1	1	0	0	0	0	0	0	0
1093	1	37	1	25.4	1286.5	0	0	0	1	1	0	0	0	0	0	0	0
1094	1	44	1	25.4	1372.5	0	0	0	1	0	0	0	0	0	0	0	0
1095	1	32	1	25.4	1356.5	0	0	0	1	1	1	0	0	0	0	0	0
1096	1	32	1	25.4	1360.5	0	0	0	1	0	0	0	0	0	0	0	0
1097	1	32	1	25.4	1201	0	0	0	1	0	0	0	0	0	0	0	0
1098	1	67	1	25.3	2010	3	0	0	1	0	0	0	0	1	0	0	0
1099	1	87	1	25.3	1877.5	3	0	0	1	0	0	0	0	1	0	0	0
1100	1	67	1	25.3	1961.5	3	0	0	1	0	0	0	0	0	0	0	0
1101	0	65	1	25.3	1790	2	1	1	1	1	0	0	0	1	0	0	1
1102	1	70	1	25.3	1790	2	1	0	1	0	1	0	0	0	0	0	0
1103	1	58	1	25.3	1800	2	0	1	1	0	0	0	0	1	0	0	0
1104	1	62	1	25.3	1747	2	0	0	1	0	0	1	1	0	0	0	0
1105	1	53	1	25.3	1677.5	2	0	1	1	0	0	0	0	0	0	0	0
1106	1	56	1	25.3	1504.5	1	0	0	1	0	0	0	0	1	0	1	0
1107	1	56	1	25.3	1504.5	1	0	0	1	0	0	0	0	1	0	1	0
1108	1	48	1	25.3	1440	1	1	1	1	1	1	0	0	0	1	0	0
1109	1	45	1	25.3	1499.5	1	1	1	1	0	0	0	0	0	0	0	0
1110	1	49	1	25.3	1484.5	1	0	0	1	1	0	0	0	0	0	0	0
1111	1	42	1	25.3	1481	1	1	0	1	1	0	1	1	0	0	0	0
1112	1	38	1	25.3	1419.5	1	0	0	1	1	1	0	0	0	0	0	0
1113	0	44	1	25.3	1583.5	1	0	0	1	0	0	0	0	0	0	0	0
1114	1	33	1	25.3	1435	1	0	0	1	1	1	0	0	0	1	0	0
1115	1	32	1	25.3	1436.5	1	0	1	1	1	0	0	0	0	0	0	0
1116	1	40	1	25.3	1153	0	0	0	1	0	0	0	0	0	0	0	1
1117	1	51	1	25.3	1343	0	1	1	1	1	0	1	0	0	0	1	0
1118	1	50	1	25.3	1297	0	1	1	1	0	0	0	0	0	1	1	0
1119	1	52	1	25.3	1374.5	0	0	0	1	1	0	0	0	1	0	0	0
1120	0	49	1	25.3	1130	0	0	0	1	0	0	0	0	0	0	0	0
1121	1	46	1	25.3	1336.5	0	0	0	1	0	0	0	0	0	0	0	0
1122	1	38	1	25.3	1353.5	0	0	0	1	1	0	0	0	0	0	1	0
1123	0	39	1	25.3	1379.5	0	0	0	1	0	0	0	0	0	0	0	0
1124	1	33	1	25.3	1098.5	0	0	0	1	0	0	0	0	0	0	0	0
1125	1	62	1	25.2	1877	3	1	1	1	0	1	1	1	1	0	0	0
1126	0	63	1	25.2	1831	3	0	0	1	0	0	0	0	0	0	0	0
1127	1	61	1	25.2	1639	2	0	1	1	1	0	0	0	0	0	0	0
1128	0	60	1	25.2	1690.5	2	0	0	1	0	0	0	0	1	0	0	0
1129	0	61	1	25.2	1744.5	2	0	0	1	0	0	0	0	1	0	0	0
1130	0	48	1	25.2	1776	2	1	1	1	1	0	1	0	1	0	0	0
1131	1	51	1	25.2	1660.5	2	1	1	1	1	1	0	0	0	0	0	0
1132	1	51	1	25.2	1709.5	2	1	0	1	1	0	0	0	1	0	0	0
1133	1	56	1	25.2	1404.5	1	1	1	1	1	0	0	0	0	0	0	0
1134	1	59	1	25.2	1439.5	1	0	0	1	0	0	0	0	1	0	1	0
1135	1	56	1	25.2	1470	1	0	1	1	0	0	0	0	0	0	0	0
1136	1	53	1	25.2	1452.5	1	1	1	1	1	0	0	1	1	0	0	0
1137	0	46	1	25.2	1428	1	1	1	1	0	0	1	1	0	0	0	0
1138	1	47	1	25.2	1460	1	0	1	0	0	0	0	1	0	0	1	0
1139	1	50	1	25.2	1416	1	0	0	1	1	0	0	0	0	0	1	0
1140	0	50	1	25.2	1457.5	1	1	1	1	0	0	0	0	0	0	0	0
1141	1	45	1	25.2	1553	1	0	0	1	0	0	0	0	1	0	0	0
1142	1	38	1	25.2	1162	0	1	1	1	1	0	0	0	0	0	0	1
1143	1	77	1	25.2	1322	0	0	0	1	0	0	0	0	0	0	0	0
1144	1	57	1	25.2	1318.5	0	0	0	1	1	0	0	0	0	0	1	0
1145	1	56	1	25.2	1214.5	0	0	1	1	0	0	0	0	0	0	0	0
1146	1	54	1	25.2	1399	0	1	1	1	1	0	0	0	0	0	0	0
1147	1	45	1	25.2	1363	0	0	0	1	1	0	0	0	0	0	0	0
1148	1	52	1	25.2	1329	0	0	0	0	1	0	0	0	0	0	0	0
1149	1	37	1	25.2	1268.5	0	0	1	1	1	1	0	0	0	0	0	0
1150	1	44	1	25.2	1343	0	1	1	1	0	0	0	0	0	0	0	0
1151	0	41	1	25.2	921.5	0	0	1	1	0	0	0	0	0	0	0	0
1152	1	74	1	25.1	2413	3	1	1	1	0	0	0	0	1	0	0	0
1153	1	53	1	25.1	1628.5	2	0	0	1	0	0	1	0	1	0	0	0
1154	1	49	1	25.1	1682.5	2	0	1	1	0	0	0	0	0	0	0	0
1155	1	60	1	25.1	1552.5	1	1	1	1	0	0	0	0	1	0	1	0
1156	1	63	1	25.1	1407.5	1	0	0	1	1	0	0	0	0	0	0	0
1157	0	49	1	25.1	1550	1	1	1	1	1	0	0	0	1	0	0	0
1158	1	50	1	25.1	1573.5	1	1	0	1	1	0	0	0	1	0	0	0
1159	1	46	1	25.1	1559.5	1	1	0	0	1	1	0	0	0	0	0	0
1160	1	46	1	25.1	1427	1	0	0	1	0	0	0	0	0	0	0	0
1161	1	43	1	25.1	1400.5	1	0	0	1	1	0	0	0	0	0	1	0
1162	1	49	1	25.1	1213	0	1	1	1	0	0	0	0	0	0	0	1
1163	1	49	1	25.1	1258	0	0	0	1	0	0	0	0	0	1	0	1
1164	1	56	1	25.1	1354	0	0	0	1	0	0	0	0	0	0	0	0
1165	1	54	1	25.1	1391.5	0	0	0	0	1	0	1	0	0	1	0	0
1166	1	45	1	25.1	1396.5	0	0	0	0	1	1	0	0	0	1	0	0
1167	0	54	1	25.1	1075	0	0	0	1	0	0	0	0	0	0	0	0
1168	1	48	1	25.1	1309	0	0	0	1	0	0	0	0	0	0	0	0
1169	1	49	1	25.1	1368	0	0	0	1	0	0	0	0	0	0	0	0
1170	1	37	1	25.1	1177	0	1	1	0	1	0	0	0	0	1	0	0
1171	0	44	1	25.1	1383	0	1	1	1	1	0	0	0	0	0	0	0
1172	1	41	1	25.1	1319.5	0	0	0	1	1	0	0	0	0	0	0	0
1173	1	71	1	25	1813.5	3	0	0	1	1	0	1	0	1	0	0	0
1174	0	67	1	25	1812.5	3	0	1	1	0	0	1	0	0	0	0	0
1175	1	55	1	25	2053	3	1	1	1	1	1	0	0	0	0	1	0
1176	1	51	1	25	2156.5	3	0	0	0	1	0	1	1	1	1	1	0
1177	1	24	1	25	1998.5	3	0	0	1	1	0	0	0	0	0	0	0
1178	1	58	1	25	1771.5	2	1	1	1	1	1	0	0	0	0	0	0
1179	0	59	1	25	1677.5	2	1	0	1	1	0	0	0	1	0	0	0
1180	0	55	1	25	1796	2	0	0	1	1	0	0	0	0	0	0	0
1181	1	52	1	25	1602.5	2	1	1	1	1	0	0	0	0	0	0	0
1182	1	57	1	25	1414	1	1	1	1	0	0	0	0	0	0	0	1
1183	1	59	1	25	1440	1	0	0	1	1	0	1	0	0	0	0	0
1184	0	56	1	25	1408	1	1	1	1	0	0	0	0	0	0	0	0
1185	0	57	1	25	1481	1	1	1	1	0	0	0	0	0	0	0	0
1186	1	50	1	25	1474.5	1	1	0	1	1	1	1	1	0	0	0	0
1187	1	45	1	25	1484	1	0	0	1	0	0	0	1	0	0	1	0
1188	1	53	1	25	1531.5	1	0	0	1	1	0	0	0	0	0	0	0
1189	0	53	1	25	1519.5	1	0	0	1	0	0	0	0	0	0	0	0
1190	1	38	1	25	1446	1	1	0	1	1	1	0	0	0	0	0	0
1191	1	53	1	25	1346.5	0	1	1	1	0	0	0	0	1	1	0	1
1192	0	58	1	25	1341.5	0	1	1	1	1	0	1	0	0	0	0	0
1193	1	55	1	25	1338	0	1	0	1	0	0	0	0	1	0	1	0
1194	0	60	1	25	1150.5	0	0	1	1	0	0	0	0	0	0	0	0
1195	1	46	1	25	1376	0	0	1	1	1	1	1	0	1	0	0	0
1196	1	45	1	25	1379	0	0	1	1	1	0	0	0	0	0	1	0
1197	1	45	1	25	1315.5	0	0	1	1	1	0	0	0	0	0	0	0
1198	1	49	1	25	1202.5	0	1	0	1	0	0	0	0	0	0	0	0
1199	1	48	1	25	1267.5	0	0	0	0	1	0	0	0	0	0	0	0
1200	1	40	1	25	1225	0	0	0	1	0	0	0	0	0	0	1	0
1201	1	31	1	25	1267.5	0	0	0	0	1	0	0	0	0	0	0	0
1202	0	32	1	25	981.5	0	0	0	1	0	0	0	0	0	0	0	0
1203	1	28	1	25	1203	0	0	0	1	0	0	0	0	0	0	0	0
1204	1	51	1	24.9	2069	3	0	0	1	1	0	1	0	1	0	0	0
1205	1	63	1	24.9	1636.5	2	1	1	1	1	0	1	1	0	0	0	1
1206	1	62	1	24.9	1758.5	2	0	1	1	0	1	0	0	0	0	0	0
1207	1	61	1	24.9	1623	2	0	0	0	1	0	0	0	1	0	0	0
1208	1	56	1	24.9	1615	2	0	0	1	1	0	0	0	0	0	0	0
1209	1	45	1	24.9	1701	2	1	1	1	1	0	0	0	1	0	1	0
1210	1	49	1	24.9	1652.5	2	0	0	1	1	0	0	0	0	0	0	0
1211	1	53	1	24.9	1532.5	1	1	1	1	1	0	0	0	0	1	1	0
1212	1	45	1	24.9	1437	1	1	1	1	1	0	0	0	0	0	1	0
1213	1	44	1	24.9	1593.5	1	0	1	1	1	0	0	0	0	0	0	0
1214	1	48	1	24.9	1276	0	0	0	1	1	0	0	0	1	0	1	1
1215	0	66	1	24.9	1377	0	1	1	1	1	0	0	0	1	0	0	0
1216	1	56	1	24.9	1263	0	0	0	1	0	0	0	0	1	0	0	0
1217	1	56	1	24.9	1326	0	0	0	1	0	0	0	0	0	0	0	0
1218	1	47	1	24.9	1255.5	0	1	1	1	1	0	0	0	0	1	1	0
1219	1	50	1	24.9	1355	0	1	1	1	1	0	0	0	0	0	0	0
1220	0	49	1	24.9	1389.5	0	1	1	1	1	0	0	0	0	0	0	0
1221	1	50	1	24.9	1383	0	0	0	1	1	1	0	0	0	0	0	0
1222	0	51	1	24.9	1226.5	0	1	0	1	1	0	0	0	0	0	0	0
1223	1	47	1	24.9	1251	0	0	0	1	1	0	0	0	0	0	0	0
1224	0	50	1	24.9	1102.5	0	0	0	1	0	0	0	0	0	0	0	0
1225	0	46	1	24.9	1274	0	0	0	1	0	0	0	0	0	0	0	0
1226	0	54	1	24.9	1278	0	0	0	1	0	0	0	0	0	0	0	0
1227	1	52	1	24.9	1344	0	0	0	1	0	0	0	0	0	0	0	0
1228	1	43	1	24.9	1201.5	0	1	1	1	0	0	0	0	0	0	0	0
1229	1	44	1	24.9	1355.5	0	0	0	1	0	0	0	0	0	0	0	0
1230	1	30	1	24.9	1260.5	0	1	1	1	0	0	0	0	0	0	0	0
1231	1	75	1	24.8	2091	3	0	0	1	0	0	0	0	1	0	0	0
1232	1	77	1	24.8	2250	3	0	0	1	0	0	0	0	1	0	0	0
1233	1	84	1	24.8	2355	3	0	0	0	0	0	0	0	1	0	0	0
1234	0	83	1	24.8	1935	3	0	0	1	0	0	0	0	0	0	0	0
1235	1	38	1	24.8	1759	2	1	0	1	1	0	0	0	0	0	1	0
1236	1	60	1	24.8	1540.5	1	0	0	1	0	0	0	0	0	0	0	0
1237	1	56	1	24.8	1585.5	1	0	0	1	0	0	0	0	0	0	0	0
1238	1	47	1	24.8	1444	1	1	1	1	1	1	1	0	0	1	1	0
1239	1	49	1	24.8	1423	1	0	0	1	1	0	0	0	1	0	1	0
1240	1	49	1	24.8	1454.5	1	0	0	1	1	0	0	0	1	0	1	0
1241	1	51	1	24.8	1512	1	0	0	0	1	0	0	0	0	0	0	0
1242	1	39	1	24.8	1501.5	1	1	1	1	0	0	0	0	0	0	0	0
1243	0	49	1	24.8	1350	0	1	1	1	0	0	0	0	0	0	0	0
1244	1	50	1	24.8	1390.5	0	0	0	0	1	1	0	0	0	0	0	0
1245	1	46	1	24.8	1294.5	0	0	0	1	0	0	0	0	0	0	0	0
1246	0	41	1	24.8	1384.5	0	1	1	1	0	0	0	0	0	0	0	0
1247	1	42	1	24.8	1308.5	0	0	0	1	0	0	0	0	0	1	0	0
1248	1	40	1	24.8	1096.5	0	0	0	1	1	0	0	0	0	0	0	0
1249	1	39	1	24.8	1216.5	0	0	0	1	1	0	0	0	0	0	0	0
1250	1	41	1	24.8	1265	0	0	0	1	0	0	0	0	0	0	0	0
1251	1	30	1	24.8	1295.5	0	1	1	1	0	0	0	0	0	0	0	0
1252	1	34	1	24.8	1153.5	0	0	0	1	1	0	0	0	0	0	0	0
1253	0	72	1	24.7	2476	3	1	1	1	1	0	1	1	1	0	0	0
1254	0	78	1	24.7	1812.5	3	0	0	1	1	0	0	1	1	0	0	0
1255	0	81	1	24.7	1936	3	0	0	1	1	0	0	0	1	0	0	0
1256	1	57	1	24.7	1843	3	1	1	1	1	0	0	0	1	0	1	0
1257	1	47	1	24.7	1956	3	1	1	1	1	1	0	0	1	0	0	0
1258	0	66	1	24.7	1660	2	1	1	1	1	0	1	1	0	0	0	0
1259	1	63	1	24.7	1635.5	2	1	1	1	0	0	1	1	1	0	0	0
1260	0	53	1	24.7	1716.5	2	1	0	1	1	0	0	0	1	0	0	0
1261	1	50	1	24.7	1625.5	2	1	1	1	0	0	0	0	0	0	0	0
1262	1	54	1	24.7	1751	2	0	0	1	0	0	0	0	0	0	1	0
1263	1	43	1	24.7	1454	1	0	0	1	1	0	0	0	1	1	1	1
1264	1	62	1	24.7	1489	1	1	1	1	1	0	0	0	0	0	1	0
1265	1	59	1	24.7	1526.5	1	0	0	1	0	0	0	0	0	0	0	0
1266	1	50	1	24.7	1456.5	1	1	1	1	0	0	0	0	0	1	0	0
1267	1	47	1	24.7	1442.5	1	0	0	1	0	0	0	0	0	0	0	0
1268	1	47	1	24.7	1442.5	1	0	0	1	0	0	0	0	0	0	0	0
1269	1	46	1	24.7	1123.5	0	1	1	1	0	0	0	0	0	0	0	1
1270	1	63	1	24.7	1171	0	1	1	1	1	0	0	0	0	1	1	0
1271	1	57	1	24.7	1217.5	0	1	1	1	1	0	0	0	0	0	0	0
1272	1	46	1	24.7	1169	0	0	0	1	1	0	0	0	0	0	1	0
1273	1	52	1	24.7	1212	0	0	0	1	1	0	0	0	0	0	1	0
1274	1	46	1	24.7	1321.5	0	0	0	1	1	0	0	0	0	0	0	0
1275	1	45	1	24.7	1276.5	0	0	0	1	0	0	0	0	0	0	0	0
1276	1	44	1	24.7	1354	0	0	0	1	1	0	1	0	0	0	0	0
1277	1	41	1	24.7	1387	0	0	1	1	0	1	0	0	0	0	0	0
1278	1	36	1	24.7	1216	0	1	0	0	1	0	0	0	0	0	0	0
1279	1	40	1	24.7	1207	0	0	0	1	0	0	0	0	0	0	0	0
1280	0	43	1	24.7	1310.5	0	0	0	1	0	0	0	0	0	0	0	0
1281	1	80	1	24.6	2174.5	3	0	1	1	0	0	0	0	1	0	0	0
1282	1	70	1	24.6	2021.5	3	1	0	1	0	0	0	1	0	0	0	0
1283	0	63	1	24.6	1837	3	0	1	1	0	0	1	0	0	0	0	0
1284	1	48	1	24.6	1925.5	3	1	0	1	1	0	0	0	0	0	0	0
1285	0	71	1	24.6	1694	2	1	1	1	0	0	0	0	1	0	0	0
1286	0	59	1	24.6	1744	2	0	0	1	1	0	0	0	0	0	0	0
1287	1	52	1	24.6	1620.5	2	0	0	1	1	0	0	0	0	0	0	0
1288	1	64	1	24.6	1497.5	1	1	0	1	1	0	0	0	0	0	0	0
1289	1	47	1	24.6	1514.5	1	1	1	1	1	0	0	0	0	0	1	0
1290	1	47	1	24.6	1571.5	1	0	1	1	0	0	1	0	0	0	0	0
1291	1	55	1	24.6	1368	0	0	0	1	0	0	0	0	1	0	1	0
1292	1	53	1	24.6	1280	0	1	0	1	1	0	0	0	0	0	1	0
1293	1	46	1	24.6	1365	0	1	1	1	0	1	0	0	0	0	0	0
1294	0	47	1	24.6	1088	0	1	1	1	1	0	0	0	0	0	0	0
1295	1	51	1	24.6	1182	0	1	1	1	1	0	0	0	0	0	0	0
1296	1	29	1	24.6	1368.5	0	1	1	1	1	0	0	0	0	0	0	0
1297	1	29	1	24.6	1054.5	0	0	0	1	1	1	0	0	0	0	0	0
1298	1	68	1	24.5	1842.5	3	0	0	1	1	1	0	0	1	0	0	0
1299	0	71	1	24.5	2130.5	3	0	0	1	1	0	0	0	0	0	0	0
1300	1	60	1	24.5	1838.5	3	1	1	1	0	0	0	0	0	0	0	0
1301	1	56	1	24.5	1939.5	3	0	0	1	0	0	0	0	1	0	0	0
1302	1	68	1	24.5	1748	2	1	1	1	1	0	0	0	0	0	0	0
1303	0	63	1	24.5	1621	2	1	1	1	1	0	0	0	0	0	0	0
1304	0	64	1	24.5	1666	2	1	1	1	0	0	0	0	0	0	0	0
1305	1	55	1	24.5	1429.5	1	0	0	1	1	0	0	0	0	0	1	0
1306	1	49	1	24.5	1538.5	1	1	1	1	0	1	0	0	1	1	0	0
1307	1	54	1	24.5	1528	1	0	0	1	1	0	0	1	1	0	1	0
1308	1	49	1	24.5	1433	1	1	1	1	1	0	0	0	0	0	0	0
1309	1	49	1	24.5	1433	1	1	1	1	1	0	0	0	0	0	0	0
1310	1	46	1	24.5	1430.5	1	0	0	1	0	0	0	0	0	0	0	0
1311	1	44	1	24.5	1403	1	1	1	1	1	1	0	0	0	0	0	0
1312	1	36	1	24.5	1523	1	0	0	1	1	0	0	0	0	0	1	0
1313	1	42	1	24.5	1469	1	0	0	1	1	1	0	0	0	0	0	0
1314	1	55	1	24.5	1372.5	0	1	0	1	1	0	0	0	0	0	0	1
1315	1	69	1	24.5	1300.5	0	0	1	1	1	0	0	0	0	0	0	0
1316	1	55	1	24.5	1231.5	0	0	0	0	0	0	0	0	0	0	0	0
1317	1	51	1	24.5	1098.5	0	1	1	1	1	1	0	0	0	0	0	0
1318	1	47	1	24.5	1279.5	0	0	0	1	0	0	1	0	0	0	1	0
1319	1	47	1	24.5	1279.5	0	0	0	1	0	0	1	0	0	0	1	0
1320	1	49	1	24.5	1320.5	0	0	0	0	1	1	0	0	1	0	0	0
1321	1	45	1	24.5	1131	0	0	0	1	0	0	0	0	0	0	0	0
1322	1	39	1	24.5	1268.5	0	1	1	1	1	1	0	0	0	1	1	0
1323	1	37	1	24.5	1195.5	0	1	1	1	1	1	0	0	1	0	0	0
1324	1	43	1	24.5	1219	0	1	1	1	1	0	0	0	0	0	1	0
1325	1	37	1	24.5	1190	0	0	1	1	0	0	0	0	0	0	1	0
1326	1	44	1	24.5	1100.5	0	1	0	1	1	0	0	0	0	0	0	0
1327	1	43	1	24.5	847.5	0	0	0	1	1	0	0	0	0	0	0	0
1328	1	57	1	24.4	1802.5	3	0	1	1	0	0	0	0	0	0	0	1
1329	0	65	1	24.4	2255.5	3	1	0	1	1	0	0	0	1	0	0	0
1330	1	57	1	24.4	1881	3	1	1	1	0	0	0	0	1	0	0	0
1331	1	45	1	24.4	1645.5	2	0	0	1	0	0	0	0	1	0	0	0
1332	1	48	1	24.4	1624	2	0	0	1	1	0	0	0	0	0	0	0
1333	1	39	1	24.4	1699	2	1	1	1	1	0	0	0	1	0	0	0
1334	1	55	1	24.4	1479.5	1	0	0	1	0	0	0	0	0	0	1	1
1335	1	54	1	24.4	1401	1	0	0	1	0	0	0	0	0	1	0	0
1336	0	51	1	24.4	1513.5	1	0	0	1	0	0	0	0	1	0	0	0
1337	1	51	1	24.4	1487	1	0	0	0	1	0	0	0	0	0	0	0
1338	1	51	1	24.4	1454.5	1	0	0	1	0	0	0	0	0	0	0	0
1339	1	43	1	24.4	1598	1	1	1	1	1	0	0	0	0	0	0	0
1340	1	44	1	24.4	1510.5	1	0	0	1	1	0	0	0	0	0	0	0
1341	1	49	1	24.4	1272	0	1	1	1	0	0	1	0	0	1	1	1
1342	1	49	1	24.4	1341	0	1	1	1	0	0	0	0	0	1	1	1
1343	1	48	1	24.4	1272.5	0	1	1	1	0	0	0	0	0	0	0	1
1344	1	56	1	24.4	1323.5	0	0	0	0	1	0	0	0	0	0	0	0
1345	1	49	1	24.4	1203.5	0	1	1	1	1	1	0	0	0	0	0	0
1346	0	52	1	24.4	1250	0	1	1	1	0	0	0	0	1	0	0	0
1347	1	48	1	24.4	1178.5	0	0	0	1	1	0	0	0	0	0	0	0
1348	1	45	1	24.4	1347.5	0	0	0	1	1	0	0	0	0	0	0	0
1349	1	50	1	24.4	1275.5	0	0	0	1	0	0	0	0	0	0	0	0
1350	0	41	1	24.4	1393.5	0	1	1	1	0	0	0	0	0	0	0	0
1351	1	44	1	24.4	1374.5	0	0	1	1	0	0	0	0	0	0	0	0
1352	1	30	1	24.4	1114.5	0	1	1	1	0	0	0	0	0	0	0	0
1353	0	33	1	24.4	1164	0	0	0	1	0	0	0	0	0	0	0	0
1354	0	75	1	24.3	2564	3	0	0	0	1	0	0	0	0	0	0	0
1355	1	60	1	24.3	1841	3	1	0	1	1	0	1	1	0	0	0	0
1356	1	53	1	24.3	1888	3	1	1	1	1	0	0	0	1	0	0	0
1357	1	56	1	24.3	1764	2	1	1	1	1	0	1	1	0	0	0	0
1358	1	56	1	24.3	1797	2	1	1	1	1	0	0	0	0	0	0	0
1359	0	62	1	24.3	1672.5	2	1	0	1	0	0	0	0	1	0	0	0
1360	1	59	1	24.3	1618.5	2	1	1	1	0	0	0	0	0	0	0	0
1361	1	61	1	24.3	1634	2	0	0	1	1	0	0	0	0	0	0	0
1362	1	49	1	24.3	1713	2	0	0	0	1	1	0	0	1	0	0	0
1363	1	54	1	24.3	1713.5	2	1	0	1	1	0	0	0	0	0	0	0
1364	1	48	1	24.3	1408.5	1	0	0	1	1	1	1	1	1	0	0	0
1365	1	51	1	24.3	1458.5	1	0	1	1	1	0	1	0	0	0	0	0
1366	1	52	1	24.3	1486.5	1	0	0	1	1	0	0	0	0	0	0	0
1367	1	53	1	24.3	1438	1	1	0	1	0	0	0	0	0	0	0	0
1368	1	44	1	24.3	1587.5	1	1	0	1	1	1	0	0	0	0	0	0
1369	1	37	1	24.3	1580.5	1	0	0	1	1	0	0	0	0	0	1	0
1370	1	71	1	24.3	1238	0	0	0	1	0	0	0	0	0	0	0	0
1371	1	59	1	24.3	1392.5	0	0	0	1	1	0	0	0	0	0	0	0
1372	1	48	1	24.3	1254	0	1	0	1	1	0	0	0	0	0	1	0
1373	1	49	1	24.3	1323.5	0	1	0	1	1	0	0	0	1	0	0	0
1374	1	48	1	24.3	1366	0	1	1	1	0	1	0	0	0	0	0	0
1375	1	48	1	24.3	1327	0	0	0	1	1	0	1	0	0	0	0	0
1376	1	49	1	24.3	1221.5	0	0	0	1	1	0	0	0	0	0	0	0
1377	1	54	1	24.3	1271	0	0	0	1	1	0	0	0	0	0	0	0
1378	1	48	1	24.3	1273.5	0	0	0	1	1	0	0	0	0	0	0	0
1379	1	50	1	24.3	1310.5	0	0	0	1	1	0	0	0	0	0	0	0
1380	1	51	1	24.3	1376	0	0	0	1	1	0	0	0	0	0	0	0
1381	1	46	1	24.3	1241.5	0	0	0	0	1	0	0	0	0	0	0	0
1382	0	47	1	24.3	1177	0	0	0	1	0	0	0	0	0	0	0	0
1383	0	46	1	24.3	1207	0	0	0	1	0	0	0	0	0	0	0	0
1384	1	42	1	24.3	1366.5	0	1	1	1	1	1	0	0	0	0	1	0
1385	1	42	1	24.3	1244.5	0	1	1	1	1	0	0	0	0	0	0	0
1386	1	43	1	24.3	1217.5	0	0	0	1	1	0	0	0	0	0	1	0
1387	1	41	1	24.3	1206	0	0	0	1	1	0	0	0	0	0	0	0
1388	1	42	1	24.3	1361	0	0	0	1	0	0	0	0	0	0	0	0
1389	1	35	1	24.3	1396	0	0	0	1	0	0	0	0	0	0	0	0
1390	1	33	1	24.3	946.5	0	0	0	1	0	0	0	0	0	0	0	0
1391	1	65	1	24.2	1630	2	0	0	1	0	0	0	0	0	0	1	0
1392	1	58	1	24.2	1755	2	1	1	1	0	1	1	1	1	0	0	0
1393	1	49	1	24.2	1681	2	1	1	1	0	0	0	0	1	0	0	0
1394	0	50	1	24.2	1714	2	1	1	1	1	0	0	0	0	0	0	0
1395	0	46	1	24.2	1624.5	2	0	0	1	0	0	0	0	0	0	0	0
1396	1	56	1	24.2	1581	1	1	1	1	1	0	0	0	1	0	0	0
1397	1	58	1	24.2	1417.5	1	1	1	1	0	0	0	0	0	0	0	0
1398	1	49	1	24.2	1546	1	0	1	1	0	0	0	0	1	1	0	0
1399	1	49	1	24.2	1546.5	1	0	0	1	1	0	0	0	0	0	1	0
1400	0	36	1	24.2	1516.5	1	1	1	1	1	1	0	0	0	0	0	0
1401	1	36	1	24.2	1516.5	1	1	1	1	1	1	0	0	0	0	0	0
1402	1	44	1	24.2	1526	1	0	0	1	0	0	0	0	1	1	0	0
1403	1	41	1	24.2	1409	1	0	0	1	1	0	0	0	0	0	0	0
1404	1	34	1	24.2	1429.5	1	0	0	1	1	0	0	0	0	0	1	0
1405	1	29	1	24.2	1415.5	1	0	0	1	0	0	0	0	0	0	0	0
1406	1	40	1	24.2	1262.5	0	1	1	1	1	0	0	0	0	0	0	1
1407	1	55	1	24.2	1370	0	0	0	1	1	1	0	0	0	0	1	0
1408	0	61	1	24.2	1330.5	0	1	1	1	1	0	0	0	0	0	0	0
1409	1	49	1	24.2	1275	0	1	1	1	1	1	0	0	0	0	0	0
1410	1	51	1	24.2	1371	0	1	1	1	1	0	0	0	0	0	0	0
1411	0	51	1	24.2	1394	0	1	1	1	1	0	0	0	0	0	0	0
1412	1	51	1	24.2	1366.5	0	0	0	1	1	0	0	0	0	0	1	0
1413	1	45	1	24.2	1363	0	0	1	1	1	0	0	0	0	0	0	0
1414	1	49	1	24.2	1273.5	0	1	1	1	0	0	0	0	0	0	0	0
1415	1	53	1	24.2	1285.5	0	1	1	1	0	0	0	0	0	0	0	0
1416	1	48	1	24.2	1254	0	0	0	1	0	0	0	0	0	0	1	0
1417	0	49	1	24.2	1034	0	0	0	1	0	0	0	0	0	0	0	0
1418	1	46	1	24.2	1191.5	0	0	0	1	0	0	0	0	0	0	0	0
1419	1	47	1	24.2	1228.5	0	0	0	1	0	0	0	0	0	0	0	0
1420	1	44	1	24.2	1127	0	0	0	0	1	0	0	0	0	0	0	0
1421	1	37	1	24.2	1356.5	0	0	0	1	0	0	0	0	0	0	0	0
1422	1	33	1	24.2	1267.5	0	0	0	1	1	0	0	0	0	1	0	0
1423	0	34	1	24.2	877.5	0	0	0	1	1	0	0	0	0	0	0	0
1424	1	24	1	24.2	966.5	0	0	0	0	1	0	0	0	0	0	0	0
1425	1	63	1	24.1	1614	2	0	0	1	0	0	1	1	0	0	0	0
1426	0	54	1	24.1	1753	2	0	0	1	0	0	1	1	1	0	0	0
1427	1	52	1	24.1	1638.5	2	0	0	0	1	1	0	0	0	0	1	0
1428	1	64	1	24.1	1581.5	1	0	1	1	0	0	0	0	0	0	0	1
1429	0	66	1	24.1	1591.5	1	1	1	1	0	0	0	0	0	0	0	0
1430	1	37	1	24.1	1421	1	1	1	1	1	0	0	0	0	1	0	0
1431	0	55	1	24.1	1144.5	0	1	1	1	1	0	0	0	0	0	0	0
1432	1	56	1	24.1	1276.5	0	0	0	1	1	1	0	0	0	0	0	0
1433	0	58	1	24.1	1050.5	0	0	0	1	1	0	0	0	0	0	0	0
1434	1	50	1	24.1	1252.5	0	0	0	1	1	0	0	0	0	1	0	0
1435	1	47	1	24.1	1334.5	0	1	0	1	1	0	0	0	0	0	0	0
1436	1	46	1	24.1	1328	0	1	1	1	0	0	0	0	0	0	0	0
1437	1	49	1	24.1	1262	0	0	1	1	0	0	0	0	0	0	0	0
1438	0	48	1	24.1	1217	0	0	0	1	0	0	0	0	0	0	0	0
1439	1	50	1	24.1	1263.5	0	0	0	1	0	0	0	0	0	0	0	0
1440	1	38	1	24.1	1280.5	0	1	1	1	1	0	0	0	0	1	1	0
1441	1	38	1	24.1	1094.5	0	0	0	1	0	0	0	0	0	1	0	0
1442	1	38	1	24.1	1375	0	0	0	1	0	0	0	0	0	0	0	0
1443	1	25	1	24.1	1259	0	0	1	1	0	1	0	0	0	0	0	0
1444	1	33	1	24.1	1378	0	0	0	1	0	0	0	0	0	0	0	0
1445	0	63	1	24	1976.5	3	1	1	1	1	0	0	0	1	0	0	0
1446	1	56	1	24	1917.5	3	0	0	1	1	0	1	0	1	0	0	0
1447	1	48	1	24	1914	3	1	1	1	1	1	0	0	1	1	0	0
1448	1	50	1	24	1980.5	3	1	0	0	1	1	0	1	0	0	0	0
1449	1	50	1	24	1635	2	0	0	1	0	0	1	1	0	0	0	0
1450	1	45	1	24	1799.5	2	0	0	1	0	0	0	0	0	0	0	0
1451	1	60	1	24	1478.5	1	1	1	1	1	0	0	0	0	0	0	0
1452	0	57	1	24	1427	1	0	0	1	1	0	0	0	0	0	0	0
1453	1	50	1	24	1559.5	1	1	0	1	1	1	0	0	0	0	0	0
1454	1	54	1	24	1465	1	0	0	1	1	0	0	0	0	0	0	0
1455	1	54	1	24	1367.5	0	0	0	1	0	0	0	0	0	0	0	1
1456	0	45	1	24	1245.5	0	1	1	1	1	0	0	0	0	0	0	0
1457	1	48	1	24	1090.5	0	1	1	1	0	0	0	0	0	0	0	0
1458	1	51	1	24	1354	0	0	0	1	0	0	0	0	0	0	1	0
1459	0	51	1	24	1252.5	0	0	0	1	0	0	0	0	0	0	0	0
1460	0	41	1	24	1189	0	1	1	1	1	0	0	0	0	0	0	0
1461	1	44	1	24	1057.5	0	0	0	1	1	0	0	0	0	0	0	0
1462	0	44	1	24	940.5	0	0	0	1	0	0	0	0	0	0	0	0
1463	0	76	1	23.9	2142.5	3	1	0	1	1	0	0	0	1	0	0	0
1464	1	72	1	23.9	2265.5	3	0	0	1	0	0	0	0	0	0	1	0
1465	0	58	1	23.9	1959	3	0	0	1	1	0	0	0	0	0	0	0
1466	1	67	1	23.9	1444.5	1	1	1	1	0	0	0	0	1	1	0	0
1467	1	58	1	23.9	1497	1	0	0	1	1	0	0	0	0	0	0	0
1468	1	56	1	23.9	1525	1	0	0	1	1	0	0	0	0	0	0	0
1469	0	50	1	23.9	1464	1	1	1	1	1	1	0	0	1	0	0	0
1470	1	51	1	23.9	1480	1	1	1	1	1	0	0	0	0	0	0	0
1471	1	52	1	23.9	1497	1	1	1	1	1	0	0	0	0	0	0	0
1472	1	56	1	23.9	1278.5	0	1	1	1	0	0	0	0	0	0	0	1
1473	0	50	1	23.9	1329	0	1	1	1	0	0	0	0	1	0	0	0
1474	1	46	1	23.9	982.5	0	0	0	1	0	0	0	0	0	0	0	0
1475	1	48	1	23.9	1298	0	0	0	1	0	0	0	0	0	0	0	0
1476	0	43	1	23.9	1239	0	0	1	1	0	0	0	0	0	0	0	0
1477	0	40	1	23.9	1208.5	0	0	0	1	0	0	0	0	0	0	0	0
1478	1	29	1	23.9	1221	0	1	1	1	1	1	0	0	0	0	0	0
1479	1	54	1	23.8	1976	3	0	0	1	0	1	1	0	1	0	0	0
1480	0	73	1	23.8	1775	2	1	1	1	1	0	0	0	0	0	0	0
1481	0	60	1	23.8	1669.5	2	1	1	1	1	0	0	0	0	0	0	0
1482	1	64	1	23.8	1670	2	0	1	1	0	0	0	0	0	0	0	0
1483	1	53	1	23.8	1657.5	2	1	0	1	1	0	0	0	0	0	0	0
1484	0	61	1	23.8	1495.5	1	0	0	1	1	0	0	0	1	0	0	0
1485	1	52	1	23.8	1447.5	1	0	0	0	1	1	0	0	0	0	1	0
1486	1	47	1	23.8	1565	1	1	0	1	0	0	0	0	0	0	1	0
1487	0	59	1	23.8	1356.5	0	1	1	1	0	0	0	0	0	0	0	0
1488	1	55	1	23.8	1388	0	0	0	1	1	0	0	0	0	0	0	0
1489	1	58	1	23.8	1172.5	0	0	0	1	0	0	0	0	0	0	0	0
1490	1	47	1	23.8	1308	0	0	0	1	0	0	0	0	0	0	1	0
1491	1	52	1	23.8	1299.5	0	0	0	1	0	0	0	0	0	0	0	0
1492	1	44	1	23.8	1359	0	1	1	1	1	0	0	0	0	1	0	0
1493	1	39	1	23.8	1170	0	0	0	1	1	1	0	0	0	0	0	0
1494	1	40	1	23.8	1217.5	0	0	0	1	1	0	0	0	0	0	0	0
1495	1	77	1	23.7	1886.5	3	0	0	1	0	1	0	0	1	0	0	0
1496	0	70	1	23.7	2581	3	0	0	1	1	0	0	0	1	0	0	0
1497	1	70	1	23.7	2200	3	1	1	1	0	0	0	0	0	0	0	0
1498	0	70	1	23.7	1967	3	0	0	1	1	0	0	0	0	0	0	0
1499	0	59	1	23.7	1804.5	3	1	1	1	0	0	0	0	0	0	0	0
1500	1	59	1	23.7	1794.5	2	1	1	1	1	0	0	0	0	1	0	0
1501	0	62	1	23.7	1705.5	2	1	1	1	1	0	0	0	0	0	0	0
1502	1	54	1	23.7	1763	2	0	0	1	1	0	0	0	0	0	0	0
1503	1	74	1	23.7	1595	1	0	0	1	0	0	0	0	0	0	0	0
1504	0	61	1	23.7	1443	1	1	1	1	1	0	0	0	0	0	0	0
1505	0	57	1	23.7	1541	1	1	1	1	0	0	0	0	0	0	0	0
1506	0	57	1	23.7	1549.5	1	0	0	1	0	0	1	0	0	0	0	0
1507	0	59	1	23.7	1472	1	0	0	1	1	0	0	0	0	0	0	0
1508	0	59	1	23.7	1473.5	1	0	0	1	1	0	0	0	0	0	0	0
1509	1	49	1	23.7	1496	1	0	0	1	0	0	0	0	0	0	0	0
1510	1	57	1	23.7	1331	0	0	0	1	1	0	0	0	1	0	1	0
1511	1	57	1	23.7	1362.5	0	0	1	1	1	0	0	0	0	0	0	0
1512	1	55	1	23.7	1384.5	0	0	0	1	0	0	0	0	0	0	0	0
1513	1	53	1	23.7	1320	0	0	0	1	0	0	1	0	0	0	1	0
1514	1	51	1	23.7	1397.5	0	0	1	1	1	0	0	0	0	0	0	0
1515	1	40	1	23.7	1192.5	0	1	1	1	1	1	0	0	0	0	0	0
1516	1	38	1	23.7	1290.5	0	1	1	0	1	0	0	0	0	1	0	0
1517	1	43	1	23.7	1249	0	1	1	1	0	0	0	0	0	0	0	0
1518	1	38	1	23.7	1326.5	0	1	1	1	0	0	0	0	0	0	0	0
1519	1	38	1	23.7	1193	0	0	0	1	1	0	0	0	0	0	0	0
1520	1	42	1	23.7	1204	0	0	0	1	1	0	0	0	0	0	0	0
1521	0	43	1	23.7	1068	0	0	0	1	0	0	0	0	0	0	0	0
1522	1	39	1	23.7	1295	0	0	0	1	0	0	0	0	0	0	0	0
1523	1	59	1	23.6	1568.5	1	0	1	1	1	0	1	1	0	0	0	0
1524	0	59	1	23.6	1415	1	1	0	1	0	0	0	0	0	0	0	0
1525	1	41	1	23.6	1557	1	1	1	1	1	0	0	0	1	0	0	0
1526	1	60	1	23.6	1210	0	1	1	1	1	0	0	0	0	0	0	0
1527	1	45	1	23.6	1380.5	0	1	1	1	1	0	0	0	0	1	0	0
1528	1	42	1	23.6	1274	0	1	1	1	1	1	0	0	0	0	1	0
1529	1	44	1	23.6	1194.5	0	0	0	1	1	0	0	0	0	0	0	0
1530	0	34	1	23.6	1049.5	0	0	0	1	0	0	0	0	0	0	0	0
1531	1	68	1	23.5	2817	3	0	0	1	0	0	0	0	1	0	0	1
1532	1	74	1	23.5	2331.5	3	0	0	1	0	0	0	0	0	0	0	0
1533	1	55	1	23.5	1742.5	2	0	0	1	1	0	1	0	1	0	0	0
1534	0	56	1	23.5	1663.5	2	1	1	1	0	0	0	0	0	0	0	0
1535	1	41	1	23.5	1627	2	1	0	1	1	1	0	0	0	0	0	0
1536	1	28	1	23.5	1674	2	1	1	1	1	0	1	0	0	0	0	0
1537	1	56	1	23.5	1424	1	0	0	1	1	0	1	0	1	0	0	0
1538	0	59	1	23.5	1586.5	1	1	0	1	1	0	0	0	0	0	0	0
1539	1	63	1	23.5	1520	1	1	1	1	0	0	0	0	0	0	0	0
1540	1	51	1	23.5	1411.5	1	1	1	1	0	0	1	1	0	0	0	0
1541	1	54	1	23.5	1453.5	1	0	0	1	0	0	0	0	1	0	0	0
1542	1	47	1	23.5	1448	1	0	0	1	0	1	0	0	0	0	0	0
1543	1	49	1	23.5	1478	1	0	0	0	1	0	0	0	0	0	0	0
1544	1	45	1	23.5	1429.5	1	0	0	1	0	0	0	0	0	0	0	0
1545	0	56	1	23.5	1163	0	1	1	1	1	0	0	0	0	0	0	0
1546	1	62	1	23.5	1293.5	0	0	0	1	1	0	0	0	0	0	0	0
1547	1	51	1	23.5	1237	0	1	1	1	0	0	0	0	1	0	0	0
1548	1	46	1	23.5	1168.5	0	0	0	1	0	0	0	0	0	0	1	0
1549	1	49	1	23.5	1229.5	0	0	0	1	1	0	0	0	0	0	0	0
1550	0	49	1	23.5	1072	0	1	0	1	0	0	0	0	0	0	0	0
1551	1	43	1	23.5	1222	0	1	1	1	1	0	0	0	0	0	0	0
1552	0	43	1	23.5	1326	0	1	1	1	1	0	0	0	0	0	0	0
1553	0	39	1	23.5	1072	0	1	0	1	0	0	0	0	0	0	0	0
1554	1	43	1	23.5	1057	0	0	0	1	0	0	0	0	0	0	0	0
1555	0	31	1	23.5	961.5	0	0	0	1	1	0	0	0	0	0	0	0
1556	0	31	1	23.5	961.5	0	0	0	1	1	0	0	0	0	0	0	0
1557	1	31	1	23.5	1098.5	0	0	0	1	1	0	0	0	0	0	0	0
1558	0	72	1	23.4	1910.5	3	0	1	1	0	0	0	0	0	0	0	0
1559	0	63	1	23.4	2301.5	3	1	1	1	1	0	1	0	1	0	0	0
1560	0	62	1	23.4	1877	3	1	1	1	0	0	1	0	0	0	0	0
1561	1	66	1	23.4	1718.5	2	1	1	1	0	0	0	0	1	0	0	0
1562	1	64	1	23.4	1780.5	2	1	1	1	0	0	0	0	1	0	0	0
1563	0	51	1	23.4	1744.5	2	1	1	1	1	0	0	0	1	0	0	0
1564	1	49	1	23.4	1644.5	2	0	0	1	0	1	0	0	1	0	1	0
1565	0	50	1	23.4	1721	2	0	0	1	1	0	0	0	1	0	0	0
1566	1	48	1	23.4	1405.5	1	0	1	1	0	0	0	0	0	0	0	1
1567	0	63	1	23.4	1462	1	1	1	1	0	0	0	0	0	0	0	0
1568	1	63	1	23.4	1415	1	0	0	1	0	0	0	0	0	0	1	0
1569	0	55	1	23.4	1456.5	1	0	0	1	0	0	0	0	1	0	0	0
1570	1	53	1	23.4	1564.5	1	1	1	1	0	0	0	0	0	0	0	0
1571	0	63	1	23.4	1319	0	1	0	1	1	0	0	0	0	0	0	1
1572	0	58	1	23.4	1363	0	0	1	1	1	0	0	0	0	0	0	0
1573	0	43	1	23.4	834.5	0	0	0	1	1	1	0	0	0	0	0	0
1574	1	24	1	23.4	1263.5	0	0	0	1	0	0	0	0	0	0	0	0
1575	1	77	1	23.3	1854	3	0	0	1	1	0	0	0	1	0	0	0
1576	1	62	1	23.3	1800	2	1	1	1	0	0	0	0	0	0	1	0
1577	0	56	1	23.3	1620.5	2	1	1	1	0	0	0	0	1	0	0	0
1578	1	51	1	23.3	1673.5	2	0	0	1	0	0	0	0	0	0	0	0
1579	1	43	1	23.3	1611	2	0	0	1	0	0	0	0	0	0	0	0
1580	1	50	1	23.3	1584.5	1	1	1	1	1	0	0	0	0	0	0	0
1581	1	46	1	23.3	1483.5	1	0	0	0	1	0	1	0	0	0	0	0
1582	1	43	1	23.3	1469	1	1	1	1	1	1	0	0	0	0	1	0
1583	1	57	1	23.3	1396	0	1	1	1	1	1	0	0	0	0	0	0
1584	1	51	1	23.3	1357.5	0	1	1	1	0	0	0	0	0	0	0	0
1585	0	36	1	23.3	1311.5	0	0	0	1	0	0	0	0	0	0	0	0
1586	1	31	1	23.3	1324.5	0	0	0	1	1	0	0	0	0	1	1	0
1587	0	25	1	23.3	1258	0	0	0	1	0	0	0	0	0	0	0	0
1588	0	48	1	23.2	1830.5	3	0	0	1	0	0	0	0	0	0	0	1
1589	1	43	1	23.2	1742	2	0	0	1	0	0	0	0	0	0	0	0
1590	1	59	1	23.2	1501.5	1	1	1	1	1	0	0	0	0	0	0	0
1591	0	56	1	23.2	1577	1	1	1	1	0	0	0	0	0	0	0	0
1592	0	50	1	23.2	1565	1	0	0	1	0	0	0	0	1	0	0	0
1593	1	57	1	23.2	1289.5	0	1	0	1	1	1	0	0	0	0	0	0
1594	1	60	1	23.2	1160	0	0	0	1	1	0	0	0	0	0	0	0
1595	1	50	1	23.2	1377	0	1	1	1	0	0	0	0	0	1	0	0
1596	0	52	1	23.2	1084	0	1	1	1	0	0	0	0	0	0	0	0
1597	0	50	1	23.2	1221	0	0	0	1	0	0	0	0	0	0	0	0
1598	0	49	1	23.2	1248	0	0	0	1	0	0	0	0	0	0	0	0
1599	1	51	1	23.2	1326	0	0	0	0	0	0	0	0	0	0	0	0
1600	1	39	1	23.2	1063	0	0	0	1	0	0	0	0	0	1	1	0
1601	1	42	1	23.2	1284	0	0	0	1	0	0	0	0	0	0	0	0
1602	1	41	1	23.2	1386	0	0	0	1	0	0	0	0	0	0	0	0
1603	0	69	1	23.1	2132	3	0	0	1	0	0	0	0	0	0	0	0
1604	0	68	1	23.1	1602.5	2	0	0	1	0	0	0	0	0	0	0	0
1605	1	52	1	23.1	1788.5	2	0	0	0	1	0	0	0	1	0	1	0
1606	0	55	1	23.1	1516	1	1	1	1	1	0	0	0	0	0	0	0
1607	1	64	1	23.1	1555.5	1	0	0	1	1	0	1	0	0	0	0	0
1608	0	64	1	23.1	1481.5	1	1	1	1	0	0	0	0	0	0	0	0
1609	1	54	1	23.1	1459.5	1	1	0	1	1	0	0	0	0	0	1	0
1610	0	53	1	23.1	1411	1	0	0	1	0	0	1	0	0	0	0	0
1611	1	50	1	23.1	1423	1	0	0	1	1	0	0	0	0	0	0	0
1612	1	33	1	23.1	1448	1	0	1	1	0	0	0	0	0	0	0	0
1613	1	55	1	23.1	1355	0	0	0	1	0	0	1	1	0	0	1	0
1614	0	57	1	23.1	1398.5	0	1	1	1	1	0	0	0	0	0	0	0
1615	0	57	1	23.1	1265.5	0	0	0	1	1	0	0	0	0	0	0	0
1616	1	45	1	23.1	1301	0	0	0	1	1	0	0	0	1	0	1	0
1617	1	47	1	23.1	1187	0	1	1	1	0	0	0	0	0	0	1	0
1618	1	54	1	23.1	1298.5	0	0	0	1	1	0	0	1	0	0	0	0
1619	1	51	1	23.1	1353.5	0	0	0	1	0	0	0	0	0	0	1	0
1620	1	46	1	23.1	1316.5	0	0	0	1	0	0	0	0	0	0	0	0
1621	1	41	1	23.1	1391.5	0	1	0	1	1	0	0	0	0	1	0	0
1622	0	43	1	23.1	1129	0	1	0	1	0	0	0	0	0	0	0	0
1623	0	37	1	23.1	1074.5	0	0	0	1	0	0	0	0	0	0	0	0
1624	1	27	1	23.1	1307.5	0	0	0	1	0	0	0	0	0	0	0	0
1625	0	58	1	23	1580.5	1	1	1	1	0	0	0	0	0	0	0	0
1626	0	59	1	23	1588.5	1	1	1	1	0	0	0	0	0	0	0	0
1627	1	49	1	23	1572	1	0	0	1	1	0	0	0	0	1	0	0
1628	0	36	1	23	1579	1	0	1	1	0	0	0	0	0	0	0	0
1629	1	57	1	23	1388	0	0	1	1	0	0	0	0	0	0	1	0
1630	1	50	1	23	1206.5	0	0	0	1	0	0	0	0	0	0	0	0
1631	0	41	1	23	1333.5	0	0	0	1	0	0	0	0	0	0	0	0
1632	1	68	1	22.9	2095	3	1	1	1	0	0	0	0	1	1	0	1
1633	1	49	1	22.9	1672	2	1	1	1	1	0	0	0	0	0	0	0
1634	0	50	1	22.9	1650.5	2	1	0	1	1	0	0	0	0	0	0	0
1635	0	50	1	22.9	1428.5	1	0	0	1	1	0	0	0	0	0	0	0
1636	1	52	1	22.9	1484	1	0	0	1	1	0	0	0	0	0	0	0
1637	1	55	1	22.9	1280	0	0	0	1	1	0	0	0	0	0	0	0
1638	1	62	1	22.9	1321.5	0	0	1	1	0	0	0	0	0	0	0	0
1639	1	62	1	22.9	1321.5	0	0	1	1	0	0	0	0	0	0	0	0
1640	0	59	1	22.9	1313	0	0	0	1	0	0	0	0	0	0	0	0
1641	0	50	1	22.9	1331.5	0	1	1	1	1	0	0	0	0	0	0	0
1642	1	50	1	22.9	1218.5	0	0	1	1	0	0	0	0	0	0	1	0
1643	0	47	1	22.9	1209.5	0	0	0	1	1	0	0	0	0	1	0	0
1644	1	47	1	22.9	1183.5	0	0	0	1	1	0	0	0	0	0	0	0
1645	0	51	1	22.9	1350.5	0	0	0	1	1	0	0	0	0	0	0	0
1646	0	48	1	22.9	1378	0	0	1	1	0	0	0	0	0	0	0	0
1647	0	50	1	22.9	1182.5	0	0	0	1	0	0	0	0	0	0	0	0
1648	1	44	1	22.9	1256	0	0	0	1	1	0	0	0	0	0	1	0
1649	0	44	1	22.9	1219.5	0	0	1	1	1	0	0	0	0	0	0	0
1650	1	36	1	22.9	1216	0	0	0	1	1	0	0	0	0	0	0	0
1651	1	44	1	22.9	1252.5	0	0	0	1	1	0	0	0	0	0	0	0
1652	1	35	1	22.9	1324	0	0	1	1	0	0	0	0	0	0	0	0
1653	1	44	1	22.9	1368	0	0	0	0	0	0	0	0	0	0	0	0
1654	0	27	1	22.9	1295.5	0	1	1	1	1	0	0	0	0	0	0	0
1655	1	57	1	22.8	2005.5	3	1	1	1	1	0	1	0	0	0	0	0
1656	1	63	1	22.8	1909.5	3	1	1	1	0	0	0	0	0	0	0	0
1657	1	54	1	22.8	1681.5	2	0	1	1	0	0	0	0	1	0	1	0
1658	0	54	1	22.8	1769.5	2	1	1	1	1	0	0	0	0	0	0	0
1659	1	48	1	22.8	1543	1	0	0	1	1	1	0	0	0	0	0	0
1660	1	50	1	22.8	1411	1	1	1	1	0	0	0	0	0	0	0	0
1661	1	47	1	22.8	1148.5	0	1	1	0	1	0	0	0	0	1	1	1
1662	1	48	1	22.8	1174.5	0	1	0	1	1	0	0	0	0	0	0	0
1663	1	45	1	22.8	1393.5	0	1	1	1	0	0	0	0	0	0	0	0
1664	1	49	1	22.8	1223.5	0	0	0	1	1	0	0	0	0	0	0	0
1665	1	41	1	22.8	1195	0	0	0	1	0	0	0	0	0	0	0	0
1666	1	42	1	22.8	1281.5	0	0	0	1	0	0	0	0	0	0	0	0
1667	0	80	1	22.7	2362.5	3	1	1	1	0	0	0	0	0	0	0	0
1668	1	57	1	22.7	1876	3	1	1	1	0	0	1	0	1	0	0	0
1669	1	64	1	22.7	1640	2	1	1	1	1	1	0	0	0	0	0	1
1670	0	56	1	22.7	1661	2	0	0	1	0	0	1	1	1	0	0	0
1671	0	56	1	22.7	1613.5	2	1	1	1	0	0	0	0	1	0	0	0
1672	1	64	1	22.7	1714.5	2	0	0	1	1	0	0	0	0	0	0	0
1673	1	58	1	22.7	1614	2	0	1	1	0	0	0	0	0	0	0	0
1674	0	51	1	22.7	1626.5	2	0	0	1	1	0	0	0	1	0	0	0
1675	1	51	1	22.7	1509.5	1	0	0	1	1	0	0	0	0	0	0	0
1676	1	43	1	22.7	1424.5	1	1	1	1	0	0	0	0	0	1	0	0
1677	0	38	1	22.7	1416.5	1	0	0	1	1	0	0	0	0	0	0	0
1678	1	38	1	22.7	1416.5	1	0	0	1	1	0	0	0	0	0	0	0
1679	1	40	1	22.7	1174	0	0	0	1	0	0	0	0	0	0	0	1
1680	1	31	1	22.7	1260	0	0	0	1	0	0	0	0	0	0	0	1
1681	1	37	1	22.7	1246.5	0	1	1	1	1	0	0	0	0	0	0	0
1682	1	43	1	22.7	1375.5	0	0	0	1	0	0	0	0	0	0	1	0
1683	0	31	1	22.7	1311	0	0	0	1	1	0	0	0	0	0	0	0
1684	1	27	1	22.7	1238.5	0	0	0	1	0	0	0	0	0	0	0	0
1685	1	31	1	22.7	1255	0	0	0	1	0	0	0	0	0	0	0	0
1686	1	72	1	22.6	2633	3	0	0	1	0	0	0	0	1	0	0	0
1687	1	72	1	22.6	2030.5	3	0	0	1	0	0	0	0	0	0	0	0
1688	1	57	1	22.6	1975	3	0	0	1	1	0	0	0	0	0	0	0
1689	0	55	1	22.6	1747	2	0	0	1	0	0	0	0	0	0	0	0
1690	1	59	1	22.6	1461	1	1	1	1	0	1	0	0	1	1	0	0
1691	1	61	1	22.6	1558	1	1	0	1	1	1	0	0	0	0	0	0
1692	1	38	1	22.6	1463	1	1	1	1	0	0	0	0	0	1	0	0
1693	1	54	1	22.6	1329	0	1	1	1	0	0	0	0	0	0	0	0
1694	1	45	1	22.6	1238	0	0	0	1	1	0	0	0	0	0	0	0
1695	1	64	1	22.5	2313.5	3	1	1	1	0	0	0	0	1	0	0	0
1696	1	60	1	22.5	1620.5	2	0	0	1	0	0	0	0	1	0	0	0
1697	1	49	1	22.5	1611.5	2	1	1	1	0	1	0	0	1	0	0	0
1698	1	47	1	22.5	1432	1	1	1	1	1	1	0	0	0	0	0	0
1699	1	47	1	22.5	1500	1	0	1	1	0	0	0	0	0	1	1	0
1700	1	49	1	22.5	1492	1	0	0	1	1	0	0	0	0	0	0	0
1701	1	47	1	22.5	1315.5	0	1	1	1	0	0	1	1	0	0	0	0
1702	1	38	1	22.5	1288	0	1	1	1	0	0	0	0	0	0	0	0
1703	1	37	1	22.5	1395	0	0	1	1	0	0	0	0	0	0	0	0
1704	1	47	1	22.4	1637	2	0	0	1	1	1	0	0	1	0	0	0
1705	0	44	1	22.4	1729	2	0	0	1	1	0	0	0	1	0	0	0
1706	1	48	1	22.4	1340.5	0	1	0	1	1	1	0	0	0	1	0	0
1707	1	48	1	22.4	1351.5	0	1	1	1	1	0	0	0	0	0	0	0
1708	1	44	1	22.4	1364	0	1	1	1	1	0	0	0	0	0	0	0
1709	1	40	1	22.4	1360	0	0	0	1	0	0	0	0	0	0	1	0
1710	1	76	1	22.3	2268	3	1	1	1	0	0	0	1	1	0	0	0
1711	1	77	1	22.3	1985	3	1	1	1	0	0	0	0	1	0	0	0
1712	0	75	1	22.3	1973.5	3	0	0	1	1	0	0	0	1	0	0	0
1713	1	60	1	22.3	1863	3	1	1	1	1	0	0	0	1	0	0	0
1714	0	64	1	22.3	1702.5	2	0	0	1	0	0	1	0	0	0	0	0
1715	0	54	1	22.3	1460	1	1	0	1	1	0	0	0	0	0	0	0
1716	1	50	1	22.3	1502	1	0	0	1	0	0	0	0	0	0	0	0
1717	1	48	1	22.3	1385.5	0	1	1	1	0	0	0	0	0	0	1	0
1718	1	50	1	22.3	1386	0	1	0	1	0	0	0	0	0	1	0	0
1719	0	45	1	22.3	992	0	0	0	1	0	0	0	0	0	0	0	0
1720	1	42	1	22.3	1126.5	0	0	0	1	1	0	0	0	0	0	0	0
1721	1	72	1	22.2	2009.5	3	1	0	1	1	1	1	1	0	0	0	0
1722	1	61	1	22.2	2020	3	0	0	1	1	0	0	0	1	0	0	0
1723	0	63	1	22.2	1948	3	0	0	1	0	0	0	0	1	0	0	0
1724	0	63	1	22.2	1948	3	0	0	1	0	0	0	0	1	0	0	0
1725	0	57	1	22.2	1648	2	1	1	1	0	0	0	0	0	0	0	0
1726	1	50	1	22.2	1453.5	1	0	0	1	1	0	1	1	0	0	1	0
1727	1	47	1	22.2	1459.5	1	0	0	1	1	0	1	0	0	0	1	0
1728	0	50	1	22.2	1527	1	1	1	1	0	0	0	0	1	0	0	0
1729	1	40	1	22.2	1430.5	1	1	1	1	0	0	0	0	0	0	0	0
1730	1	88	1	22.1	2819.5	3	0	0	1	0	0	0	0	1	0	0	0
1731	1	50	1	22.1	1804	3	1	1	1	1	0	0	0	1	0	1	0
1732	1	50	1	22.1	1402	1	1	1	1	1	1	0	0	0	1	0	0
1733	1	48	1	22.1	1419	1	0	0	1	0	0	0	0	0	1	0	0
1734	1	39	1	22.1	1470	1	0	0	1	0	0	0	0	0	0	0	0
1735	1	34	1	22.1	1592	1	0	0	1	1	0	0	0	0	0	1	0
1736	1	50	1	22.1	1369	0	1	0	1	0	0	1	1	0	1	0	0
1737	1	33	1	22.1	1308.5	0	1	0	1	1	0	0	0	0	0	0	0
1738	1	59	1	22	1882	3	0	1	1	1	0	0	1	0	0	0	0
1739	0	50	1	22	1411.5	1	1	1	1	0	0	0	0	0	0	0	0
1740	0	51	1	22	1240	0	1	0	1	1	0	0	0	0	0	0	0
1741	1	50	1	22	1246	0	0	0	1	0	0	0	0	0	0	1	0
1742	1	42	1	22	1376.5	0	1	1	1	1	0	0	0	0	0	0	0
1743	1	43	1	22	1393	0	0	0	1	1	0	0	0	0	0	0	0
1744	1	40	1	22	1289	0	0	0	1	0	0	0	0	0	0	0	0
1745	1	69	1	21.9	1927.5	3	1	1	1	1	0	0	0	0	0	0	0
1746	0	85	1	21.9	2173	3	0	0	0	0	0	1	1	1	0	0	0
1747	1	48	1	21.9	1491.5	1	1	1	1	1	0	0	0	0	0	0	0
1748	1	49	1	21.9	1594	1	0	1	1	1	0	0	0	0	0	0	0
1749	0	49	1	21.9	1512.5	1	1	1	1	0	0	0	0	0	0	0	0
1750	1	56	1	21.9	1348.5	0	0	0	0	1	0	0	0	0	0	0	0
1751	0	47	1	21.9	982.5	0	0	1	1	0	0	0	0	0	0	0	0
1752	0	32	1	21.9	1044	0	0	0	1	0	0	0	0	0	0	0	0
1753	0	58	1	21.8	1675.5	2	1	1	1	0	0	0	0	0	0	0	0
1754	0	57	1	21.8	1511	1	1	1	1	1	0	0	0	0	0	0	1
1755	0	58	1	21.8	1561	1	0	0	1	0	0	0	0	1	0	0	0
1756	0	52	1	21.8	1417	1	0	0	1	1	0	0	0	0	0	0	0
1757	1	52	1	21.8	1470	1	0	0	1	0	0	0	0	0	0	0	0
1758	1	60	1	21.8	1319	0	0	0	0	1	0	0	0	0	0	1	0
1759	0	47	1	21.8	877	0	1	1	1	1	0	0	0	0	0	0	0
1760	0	50	1	21.8	1314.5	0	1	0	1	0	0	0	0	0	0	0	0
1761	0	37	1	21.8	1108.5	0	0	0	1	0	0	0	0	0	0	0	0
1762	0	68	1	21.7	1666	2	1	0	1	1	0	1	1	1	0	0	0
1763	0	48	1	21.7	1199.5	0	1	1	1	1	0	0	0	0	0	0	0
1764	1	51	1	21.7	1239	0	0	0	0	0	0	1	1	1	0	0	0
1765	0	50	1	21.7	1210	0	0	0	1	0	0	0	0	0	0	0	0
1766	1	43	1	21.7	1299.5	0	0	0	1	0	0	0	0	0	0	0	0
1767	1	59	1	21.6	1970.5	3	0	0	1	1	0	0	0	1	0	1	0
1768	0	45	1	21.6	1411	1	0	0	1	0	0	0	0	0	0	0	0
1769	0	50	1	21.6	1142.5	0	1	0	1	1	0	0	0	0	0	0	1
1770	1	50	1	21.6	1222	0	0	1	1	1	0	0	0	0	1	0	0
1771	1	48	1	21.6	1202	0	0	0	1	0	0	0	0	0	0	0	0
1772	0	43	1	21.6	1137	0	0	0	1	1	0	0	0	0	0	0	0
1773	1	41	1	21.6	1257.5	0	0	0	1	0	0	0	0	0	0	0	0
1774	1	69	1	21.5	1772.5	2	0	0	0	0	0	0	0	0	0	0	0
1775	0	57	1	21.5	1513.5	1	0	0	1	0	0	0	0	1	0	0	0
1776	0	50	1	21.5	1552	1	0	0	1	0	0	0	0	0	0	0	0
1777	1	33	1	21.5	1325	0	0	0	1	0	1	0	0	0	0	0	0
1778	1	78	1	21.4	2487.5	3	0	0	1	1	1	0	0	1	0	0	0
1779	1	43	1	21.4	1412	1	0	0	1	0	0	0	0	0	0	1	0
1780	1	41	1	21.4	1556	1	0	0	1	1	0	0	0	0	0	0	0
1781	0	53	1	21.4	1246	0	1	0	1	0	0	1	0	0	0	0	0
1782	0	41	1	21.4	1309	0	0	0	1	0	0	0	0	0	0	0	0
1783	1	53	1	21.3	1733	2	1	1	1	0	0	0	0	0	0	0	0
1784	1	51	1	21.3	1322	0	0	0	1	0	0	0	0	0	0	1	0
1785	1	46	1	21.3	1344.5	0	0	0	1	1	0	0	0	0	0	0	0
1786	1	42	1	21.3	1240.5	0	0	0	0	1	0	0	0	0	0	0	0
1787	1	24	1	21.3	1116	0	0	0	1	0	0	0	0	0	0	0	0
1788	0	58	1	21.2	1830	3	1	1	1	1	0	0	0	1	0	0	0
1789	0	57	1	21.2	1647	2	1	0	1	1	0	0	0	0	0	0	0
1790	1	61	1	21.2	1374	0	0	0	1	0	0	0	0	0	0	0	1
1791	0	48	1	21.2	957.5	0	0	0	1	0	0	0	0	0	0	0	1
1792	0	50	1	21.1	1666.5	2	1	0	1	1	0	0	0	0	0	0	0
1793	0	54	1	21.1	1762.5	2	1	1	1	0	0	0	0	0	0	0	0
1794	1	52	1	21.1	1438.5	1	1	0	1	1	0	0	0	0	0	1	0
1795	0	60	1	21.1	1372	0	1	1	1	0	0	0	0	0	0	0	0
1796	0	44	1	21.1	1072	0	0	0	1	1	0	0	0	0	0	0	0
1797	1	71	1	21	2391	3	0	1	1	0	0	0	0	0	0	0	0
1798	0	58	1	21	2106	3	0	0	1	1	0	0	0	1	0	0	0
1799	0	58	1	21	1926	3	1	0	1	0	0	0	0	0	0	0	0
1800	1	51	1	21	1694.5	2	0	1	1	0	0	0	0	0	0	0	0
1801	1	60	1	21	1326	0	0	0	1	1	0	0	0	0	0	1	0
1802	1	51	1	21	1375	0	0	0	1	1	1	0	0	1	0	0	0
1803	0	45	1	20.9	1176.5	0	1	1	1	1	0	0	0	0	0	0	0
1804	1	53	1	20.9	1337	0	0	0	0	1	1	0	0	0	0	0	0
1805	0	23	1	20.9	1151.5	0	1	1	1	0	0	0	0	0	0	0	0
1806	0	77	1	20.8	2185.5	3	0	0	1	0	0	0	0	1	0	0	0
1807	0	59	1	20.8	1717	2	1	0	1	1	0	0	0	0	0	0	0
1808	0	65	1	20.8	1398	0	1	1	1	0	0	0	0	0	0	0	0
1809	1	88	1	20.7	1851	3	0	0	1	0	0	0	0	1	1	0	0
1810	0	60	1	20.7	1806.5	3	1	1	1	0	0	0	0	0	0	0	0
1811	1	56	1	20.7	1402.5	1	1	1	1	1	0	1	0	1	0	0	0
1812	1	47	1	20.7	1159.5	0	1	1	1	0	0	0	0	0	0	0	1
1813	1	50	1	20.7	1135	0	0	0	1	0	0	0	0	0	0	1	1
1814	1	55	1	20.7	1314.5	0	1	1	1	1	0	0	0	0	0	0	0
1815	0	51	1	20.7	1338.5	0	1	1	1	0	0	0	0	0	0	0	0
1816	1	65	1	20.6	1048.5	0	1	0	1	0	0	0	0	0	0	0	0
1817	1	43	1	20.6	1172	0	0	0	1	0	1	0	0	0	1	0	0
1818	1	45	1	20.5	1203.5	0	0	0	1	0	0	0	0	0	0	1	0
1819	0	40	1	20.5	1369.5	0	0	0	1	1	0	0	0	0	0	0	0
1820	1	69	1	20.4	1465.5	1	1	0	1	0	0	0	0	0	0	0	0
1821	1	54	1	20.4	1247.5	0	0	0	1	1	0	0	0	0	0	0	0
1822	0	73	1	20.3	2291.5	3	0	0	1	0	0	0	0	1	0	0	0
1823	0	74	1	20.3	2185.5	3	0	0	0	0	0	1	1	0	0	0	0
1824	1	68	1	20.3	1743.5	2	0	0	1	0	0	0	0	1	0	1	0
1825	0	51	1	20.3	1166.5	0	0	0	1	0	0	0	0	0	0	0	0
1826	0	37	1	20.3	1054.5	0	1	0	1	1	0	0	0	0	0	0	0
1827	0	26	1	20.3	800	0	0	0	1	0	0	0	0	0	0	0	0
1828	1	42	1	20.2	1603	2	0	0	1	1	0	0	0	0	1	0	0
1829	1	41	1	20.2	1214	0	0	0	1	1	0	0	0	0	0	0	0
1830	0	83	1	20.1	2257	3	1	0	0	0	0	0	0	1	0	0	0
1831	1	74	1	20.1	2278.5	3	0	0	1	0	0	0	0	0	0	0	0
1832	0	58	1	20.1	1478.5	1	1	1	1	1	0	0	0	1	0	0	0
1833	0	36	1	20.1	1091.5	0	1	0	1	0	0	0	0	0	0	0	0
1834	1	62	1	20	1688.5	2	0	0	1	0	0	0	0	0	0	0	0
1835	0	45	1	20	1247	0	1	1	1	0	0	0	0	0	0	0	0
1836	1	47	1	19.8	1819	3	0	0	1	0	0	0	0	1	0	0	0
1837	0	47	1	19.8	1164	0	0	0	1	0	0	0	0	0	0	0	0
1838	0	68	1	19.7	2216	3	1	1	1	0	0	0	0	1	0	0	0
1839	0	39	1	19.7	1074	0	0	0	1	0	0	0	0	0	0	0	0
1840	0	61	1	19.6	1565.5	1	0	0	1	0	0	0	0	0	0	0	0
1841	0	48	1	19.6	1093.5	0	0	0	1	0	0	0	0	0	0	0	0
1842	0	73	1	19.5	1603.5	2	0	0	0	0	0	0	0	0	0	0	0
1843	0	43	1	19.5	1049.5	0	0	0	1	0	0	0	0	0	0	0	1
1844	0	77	1	19.4	2270.5	3	1	1	1	0	0	0	0	1	0	0	0
1845	0	56	1	19.3	1369	0	0	0	1	0	0	0	0	0	0	0	0
1846	0	34	1	19.3	1099.5	0	0	0	1	0	0	0	0	0	0	0	0
1847	1	89	1	19.2	2308.5	3	1	1	1	0	0	0	0	0	0	0	0
1848	1	33	1	18.7	1219.5	0	0	0	1	0	0	0	0	0	0	0	0
1849	1	56	1	18.6	2316	3	1	0	1	1	1	0	0	1	0	0	0
1850	0	90	1	18.4	2120.5	3	1	1	1	1	0	0	0	1	0	0	0
1851	0	32	1	18	1104.5	0	0	0	1	0	0	0	0	0	0	0	0
1852	1	60	1	17.9	1220.5	0	0	0	1	0	0	0	0	0	0	0	0
1853	1	81	1	17.3	2342	3	0	0	1	0	0	0	0	0	0	0	0
1854	1	30	1	17.2	1044	0	0	0	1	0	0	0	0	0	0	0	0
1855	1	50	1	15.8	1220.5	0	0	0	1	1	0	0	0	0	0	0	0
1856	1	48	0	39.7	1453.5	1	0	0	1	1	0	0	0	0	0	0	1
1857	1	41	0	39.7	1161	0	1	1	1	0	0	0	0	0	1	0	0
1858	0	40	0	39.7	1386.5	0	0	0	1	0	0	0	0	0	0	0	0
1859	0	31	0	39.7	1044.5	0	0	0	1	0	0	0	0	0	0	0	0
1860	1	38	0	37.7	1550	1	0	0	1	1	0	1	0	0	0	0	0
1861	1	37	0	37.3	1361.5	0	1	1	1	1	0	0	0	0	0	0	0
1862	0	29	0	35.5	1037	0	0	1	1	1	0	0	0	0	0	0	0
1863	1	45	0	33.4	1704.5	2	1	1	1	1	0	0	0	1	0	0	0
1864	1	43	0	33.1	1595.5	1	0	0	1	1	1	0	0	0	0	0	0
1865	1	53	0	32.9	1042.5	0	0	0	1	1	0	0	0	0	0	0	1
1866	1	74	0	32.7	1703.5	2	0	0	1	0	0	0	0	1	0	0	0
1867	1	60	0	32.3	1549	1	0	0	1	0	0	0	0	0	0	0	0
1868	1	72	0	32	1309	0	0	0	1	0	0	0	0	0	0	0	1
1869	0	32	0	32	1034	0	0	0	1	0	0	0	0	0	0	0	0
1870	1	38	0	31.7	1162	0	1	1	1	0	1	0	0	0	0	0	0
1871	1	35	0	31.7	1023	0	0	0	0	0	1	0	0	0	0	0	0
1872	0	63	0	31.6	1725	2	0	0	1	0	0	0	0	1	0	0	0
1873	0	35	0	31.6	1117	0	1	1	1	1	0	0	0	0	0	0	0
1874	0	62	0	31.4	1595	1	0	1	1	0	0	0	0	0	0	0	1
1875	1	79	0	30.9	1709	2	0	0	0	1	0	0	0	0	0	0	0
1876	1	57	0	30.9	1426.5	1	1	1	1	1	0	1	0	0	0	1	0
1877	1	36	0	30.9	1221	0	0	0	1	0	1	0	0	0	0	0	0
1878	1	59	0	30.8	1879	3	0	0	1	0	0	0	0	1	1	1	0
1879	0	41	0	30.8	1116.5	0	0	0	1	0	0	0	0	0	0	0	1
1880	0	47	0	30.5	1556	1	0	0	1	0	0	0	0	0	0	0	0
1881	1	28	0	30.5	1097.5	0	0	1	1	0	0	0	0	0	0	0	0
1882	0	69	0	30.4	2048	3	0	1	1	0	0	0	0	1	0	0	0
1883	1	40	0	30.4	1435	1	0	0	1	1	0	0	0	0	0	0	0
1884	0	45	0	30.3	1196	0	0	0	1	0	0	0	0	0	0	0	0
1885	1	27	0	30.3	1320	0	1	1	1	1	1	0	0	0	0	1	0
1886	0	35	0	30.2	1454.5	1	0	0	1	0	1	0	0	0	0	0	0
1887	0	55	0	30.1	1617.5	2	0	0	1	0	0	0	0	0	0	0	0
1888	1	53	0	30.1	1634.5	2	0	0	0	1	0	0	0	0	0	1	0
1889	1	55	0	30.1	1411	1	1	1	1	0	1	0	0	0	0	0	0
1890	0	31	0	30.1	1026.5	0	1	1	1	0	0	0	0	0	0	0	0
1891	1	57	0	30	1283.5	0	0	0	1	0	0	0	0	0	1	0	1
1892	1	49	0	30	1284.5	0	0	1	1	0	0	0	0	0	0	0	0
1893	0	47	0	30	1160	0	0	0	1	0	0	0	0	0	0	0	0
1894	1	60	0	29.9	1671.5	2	1	1	0	1	0	0	0	0	0	0	0
1895	1	38	0	29.9	1110.5	0	0	0	1	0	0	0	0	0	0	0	1
1896	1	69	0	29.8	2056	3	1	1	1	1	1	0	0	0	0	0	0
1897	1	49	0	29.8	1656	2	0	0	1	0	1	0	1	1	0	0	0
1898	1	43	0	29.8	1609	2	1	1	1	1	1	0	0	0	0	0	0
1899	0	59	0	29.8	1451	1	0	0	1	0	0	0	0	1	0	0	0
1900	1	40	0	29.8	1136	0	1	1	1	0	0	0	0	0	1	1	0
1901	1	41	0	29.8	1163.5	0	1	1	1	0	0	1	1	0	0	0	0
1902	1	31	0	29.8	1012	0	0	1	1	0	0	0	0	0	0	0	0
1903	1	50	0	29.7	1511	1	0	0	1	0	0	0	0	1	0	0	0
1904	0	48	0	29.7	1554.5	1	0	0	1	0	0	0	0	1	0	0	0
1905	1	37	0	29.7	1468.5	1	0	0	1	0	0	0	0	0	0	0	0
1906	1	59	0	29.7	1345.5	0	0	1	1	0	0	0	0	0	0	0	0
1907	0	69	0	29.5	1402	1	0	0	1	0	0	0	0	1	0	0	0
1908	0	74	0	29.4	1652.5	2	0	1	1	0	0	0	0	1	0	0	0
1909	1	64	0	29.4	1697.5	2	0	0	1	0	0	0	0	0	0	0	0
1910	1	55	0	29.4	1480	1	0	0	1	0	0	0	0	1	0	0	0
1911	1	49	0	29.4	1235	0	0	0	1	1	1	0	0	0	1	0	0
1912	0	47	0	29.4	1309.5	0	0	0	1	0	0	0	0	0	0	0	0
1913	1	28	0	29.4	1036.5	0	0	0	1	0	0	0	0	0	0	0	0
1914	0	70	0	29.3	1852.5	3	0	0	1	1	0	1	0	0	0	0	0
1915	0	51	0	29.3	1556	1	0	0	1	0	0	0	0	0	0	0	0
1916	1	35	0	29.3	1101	0	1	0	1	1	1	0	0	0	0	0	0
1917	0	37	0	29.3	1232.5	0	0	0	1	0	0	0	0	0	0	0	0
1918	1	28	0	29.3	1189	0	1	1	1	1	0	0	0	0	0	0	0
1919	1	51	0	29.1	1154	0	0	0	1	0	0	0	0	0	0	0	0
1920	1	35	0	29.1	1013	0	1	1	1	1	0	0	0	0	0	0	0
1921	1	34	0	29.1	1243.5	0	0	0	1	0	0	0	0	0	0	1	0
1922	1	34	0	29.1	1010.5	0	0	0	1	1	0	0	0	0	0	0	0
1923	0	52	0	28.9	1677.5	2	0	0	1	0	0	0	0	1	0	0	0
1924	0	52	0	28.9	1677.5	2	0	0	1	0	0	0	0	1	0	0	0
1925	1	35	0	28.9	1181.5	0	1	1	1	1	0	0	0	0	0	0	0
1926	0	81	0	28.7	1947.5	3	1	0	0	0	0	0	0	1	0	0	0
1927	1	57	0	28.7	1970	3	1	1	1	1	0	1	0	0	0	1	0
1928	1	62	0	28.7	1861.5	3	1	1	1	0	0	0	0	0	0	0	0
1929	0	67	0	28.7	1491.5	1	1	0	1	1	0	0	0	1	0	0	0
1930	1	52	0	28.7	1493	1	1	1	1	0	0	1	0	0	0	0	0
1931	1	49	0	28.7	1415.5	1	1	1	1	1	0	0	0	0	0	0	0
1932	1	46	0	28.7	1451.5	1	1	1	1	1	0	0	0	0	0	0	0
1933	1	48	0	28.7	1527.5	1	1	1	1	1	0	0	0	0	0	0	0
1934	1	56	0	28.7	1283.5	0	1	0	1	1	1	0	0	0	0	1	0
1935	1	50	0	28.7	1227.5	0	0	0	0	0	1	0	0	0	0	0	0
1936	1	49	0	28.7	1052	0	0	0	1	0	0	0	0	0	0	0	0
1937	1	33	0	28.7	1191	0	0	1	1	1	0	0	1	0	0	0	0
1938	0	72	0	28.5	1398	0	0	0	1	0	0	0	0	0	0	0	0
1939	0	49	0	28.5	1178.5	0	1	1	1	0	0	0	0	0	0	0	0
1940	1	40	0	28.5	1355	0	0	0	1	0	0	0	0	0	0	0	0
1941	0	69	0	28.4	1652	2	1	1	1	0	0	0	0	0	0	0	0
1942	0	55	0	28.4	1682.5	2	0	0	1	1	0	0	0	1	0	0	0
1943	0	59	0	28.4	1524.5	1	0	0	1	0	0	0	1	1	0	0	0
1944	1	45	0	28.4	1544	1	0	1	1	1	1	0	0	1	0	0	0
1945	1	47	0	28.4	1522	1	1	1	1	1	0	0	0	0	0	0	0
1946	1	50	0	28.4	1319.5	0	0	0	1	0	1	0	0	0	0	1	1
1947	1	50	0	28.4	1365	0	1	1	1	1	0	0	0	0	0	1	0
1948	1	52	0	28.4	1199	0	1	1	1	0	1	0	0	0	0	0	0
1949	1	48	0	28.4	1211	0	0	0	1	0	0	0	0	0	1	1	0
1950	1	45	0	28.4	1251	0	0	0	1	1	0	0	0	0	0	0	0
1951	1	42	0	28.4	1140	0	0	0	1	0	0	0	0	0	1	1	0
1952	1	28	0	28.4	1047	0	1	1	1	1	0	0	0	0	0	0	0
1953	1	30	0	28.4	1124	0	0	0	1	1	0	0	0	0	0	0	0
1954	1	67	0	28.3	1509	1	0	0	1	0	0	0	0	1	0	0	0
1955	0	48	0	28.3	1403	1	0	0	1	0	0	0	0	0	0	0	0
1956	1	44	0	28.3	1471	1	0	0	1	1	0	1	0	0	0	1	0
1957	0	40	0	28.3	1221.5	0	1	1	1	1	0	0	0	0	0	0	0
1958	0	39	0	28.3	1096.5	0	1	1	1	0	0	0	0	0	0	0	0
1959	0	51	0	28.2	1219	0	0	1	1	0	0	0	0	0	0	0	1
1960	0	50	0	28.2	1321.5	0	1	1	1	0	0	0	0	0	0	0	0
1961	0	45	0	28.2	1276	0	0	0	1	0	0	0	0	0	0	0	0
1962	1	63	0	28.1	1767.5	2	0	0	1	1	0	1	0	1	0	1	0
1963	0	59	0	28.1	1495	1	1	1	1	0	0	0	0	0	0	0	0
1964	0	46	0	28.1	1413	1	0	0	1	0	0	0	0	0	0	0	0
1965	0	41	0	28.1	1435.5	1	0	0	1	0	0	0	0	0	0	0	0
1966	1	61	0	28.1	1308.5	0	0	0	0	1	0	1	1	1	0	0	0
1967	0	47	0	28.1	1356.5	0	0	0	1	1	0	0	0	1	0	0	0
1968	1	46	0	28.1	1102	0	0	0	1	1	0	0	0	0	0	0	0
1969	1	48	0	28.1	1216.5	0	0	0	1	0	0	0	0	0	0	0	0
1970	1	37	0	28.1	1202	0	1	1	1	1	0	0	0	0	1	1	0
1971	0	38	0	28.1	1038	0	1	1	1	1	0	0	0	0	0	0	0
1972	1	42	0	28.1	1142.5	0	0	0	1	1	0	0	0	0	0	0	0
1973	1	30	0	28.1	1261.5	0	0	0	1	1	0	0	0	0	0	0	0
1974	1	32	0	28.1	1199	0	0	0	1	0	0	0	0	0	0	0	0
1975	1	55	0	28	1773.5	2	1	1	1	0	0	0	0	1	0	0	0
1976	1	44	0	28	1636	2	0	0	1	0	1	0	0	1	0	0	0
1977	1	41	0	28	1470	1	0	0	1	1	0	0	0	0	1	1	0
1978	1	43	0	28	1493	1	0	0	1	0	1	0	0	0	0	1	0
1979	1	53	0	28	1385	0	0	1	1	0	0	0	0	1	1	1	0
1980	1	50	0	28	1287.5	0	0	0	1	1	0	0	0	0	0	0	0
1981	1	43	0	28	1237.5	0	1	1	1	1	0	0	0	0	0	0	0
1982	1	60	0	27.9	2206.5	3	0	0	1	1	0	1	1	1	0	0	0
1983	1	54	0	27.9	1622.5	2	0	1	1	0	0	0	0	1	0	0	0
1984	1	62	0	27.9	1545.5	1	0	0	1	0	0	0	0	0	0	0	1
1985	1	54	0	27.9	1592	1	0	1	1	0	0	0	0	0	0	0	0
1986	0	58	0	27.9	1389	0	0	0	1	0	0	0	0	0	0	0	0
1987	1	52	0	27.9	1319.5	0	0	0	1	1	0	0	0	1	1	1	0
1988	1	49	0	27.8	1880.5	3	0	0	1	0	0	0	0	1	0	0	0
1989	1	46	0	27.8	1553	1	0	0	1	0	0	0	0	0	0	0	0
1990	1	51	0	27.8	1217.5	0	0	0	1	0	0	0	0	0	0	0	1
1991	1	60	0	27.8	1318.5	0	0	0	1	1	0	0	0	1	0	1	0
1992	0	55	0	27.8	1343	0	1	1	1	0	0	0	0	0	0	0	0
1993	1	79	0	27.7	2087.5	3	0	0	1	0	0	0	0	1	0	0	0
1994	0	76	0	27.7	1803.5	3	0	1	1	0	0	0	0	0	0	0	0
1995	1	63	0	27.7	2015.5	3	1	1	1	0	1	0	1	1	0	0	0
1996	1	55	0	27.7	1929	3	1	1	1	0	0	1	1	0	0	0	0
1997	1	55	0	27.7	1541	1	0	0	1	1	0	1	0	0	0	0	0
1998	1	54	0	27.7	1516	1	1	0	1	1	0	1	0	1	0	0	0
1999	1	36	0	27.7	1022.5	0	1	1	1	0	0	0	0	0	0	0	1
[truncated: 3,441 more rows]
[truncated: 1 more columns]
